# Supplementary material
Source: publisher site journal article supplement (https://www.dovepress.com/article/401430)

## Supplementary Files

Supplementary Method. Details of immunohistochemistry (IHC) and imaging of the SCLC patients.

Supplementary Table 1. The baseline characteristics of the George-SCLC cohort.

Supplementary Table 2. The baseline characteristics of the Jiang-SCLC cohort.

Supplementary Table 3. The clinical characteristics of the ICIs patients (Mariathasan et.al).

Supplementary Figure 1. The forest plot depicted the univariable and multivariable cox regression model in the ICIs-Melanoma cohort

## Supplementary Methods

### Immunohistochemistry (IHC)

Formalin-fixed paraffin-embedded (FFPE) tissues from small cell lung cancer (SCLC) were sectioned and collected onto glass slides. Antigen retrieval was performed in 10 mM sodium citrate (pH6.0) at 100 °C for 15 min. GBP5 was stained with PV-6000 immunohistochemistry (IHC) kit (ZSGB-BIO, China) according to the protocol of the manufacturer, with the GBP5 antibody (Catalog #: 67798) from Cell Signaling (United States). The images were collected with Slide Scanning System SQS-1000 (TEKSQRAY, China). Quantitation of the GBP5 signals was performed with ImageJ with IHC-Toolbox plugins.

### Imaging

All SCLC patients from the first affiliated hospital of the Hengyang Medical school, University of South China underwent computed tomography (CT) at two time points, t1 and t2. The first one was performed at initial diagnosis (t1), and the second one after 6 cycles of combination of the etoposide-cisplatin (EP) and immune checkpoint inhibitors (durvaluma) (t2). The baseline and follow-up CT scans were both obtained at the same center.

Supplementary Table 1

|                   | <b>GBP5-High<br/>(N=40)</b> | <b>GBP5-Low<br/>(N=41)</b> | <b>Overall<br/>(N=81)</b> |
|-------------------|-----------------------------|----------------------------|---------------------------|
| <b>Gender</b>     |                             |                            |                           |
| Female            | 15 (37.5%)                  | 6 (14.6%)                  | 21 (25.9%)                |
| Male              | 20 (50.0%)                  | 30 (73.2%)                 | 50 (61.7%)                |
| Missing           | 5 (12.5%)                   | 5 (12.2%)                  | 10 (12.3%)                |
| <b>Ethnicity</b>  |                             |                            |                           |
| Asian             | 6 (15.0%)                   | 2 (4.9%)                   | 8 (9.9%)                  |
| Caucasian         | 12 (30.0%)                  | 18 (43.9%)                 | 30 (37.0%)                |
| Missing           | 22 (55.0%)                  | 21 (51.2%)                 | 43 (53.1%)                |
| <b>Age</b>        |                             |                            |                           |
| Mean (SD)         | 64.5 (9.06)                 | 64.3 (8.65)                | 64.4 (8.79)               |
| Median [Min, Max] | 65.0 [47.0, 82.0]           | 64.0 [47.0, 83.0]          | 64.0 [47.0, 83.0]         |
| Missing           | 5 (12.5%)                   | 5 (12.2%)                  | 10 (12.3%)                |
| <b>Pack Years</b> |                             |                            |                           |
| Mean (SD)         | 48.1 (27.5)                 | 39.6 (22.4)                | 44.4 (25.5)               |
| Median [Min, Max] | 50.0 [0, 100]               | 37.5 [10.0, 90.0]          | 45.0 [0, 100]             |
| Missing           | 13 (32.5%)                  | 21 (51.2%)                 | 34 (42.0%)                |

Supplementary Table 2

|                          | <b>GBP5-High<br/>(N=42)</b> | <b>GBP5-Low<br/>(N=43)</b> | <b>Overall<br/>(N=85)</b> |
|--------------------------|-----------------------------|----------------------------|---------------------------|
| <b>Gender</b>            |                             |                            |                           |
| Female                   | 2 (4.8%)                    | 4 (9.3%)                   | 6 (7.1%)                  |
| Male                     | 26 (61.9%)                  | 25 (58.1%)                 | 51 (60.0%)                |
| Missing                  | 14 (33.3%)                  | 14 (32.6%)                 | 28 (32.9%)                |
| <b>Cigarette Smoking</b> |                             |                            |                           |
| Non-smoker               | 7 (16.7%)                   | 9 (20.9%)                  | 16 (18.8%)                |
| Smoker                   | 21 (50.0%)                  | 20 (46.5%)                 | 41 (48.2%)                |
| Missing                  | 14 (33.3%)                  | 14 (32.6%)                 | 28 (32.9%)                |
| <b>Stage</b>             |                             |                            |                           |
| I                        | 8 (19.0%)                   | 4 (9.3%)                   | 12 (14.1%)                |
| II                       | 6 (14.3%)                   | 4 (9.3%)                   | 10 (11.8%)                |
| III                      | 13 (31.0%)                  | 21 (48.8%)                 | 34 (40.0%)                |
| IV                       | 1 (2.4%)                    | 0 (0%)                     | 1 (1.2%)                  |
| Missing                  | 14 (33.3%)                  | 14 (32.6%)                 | 28 (32.9%)                |
| <b>Age</b>               |                             |                            |                           |
| Mean (SD)                | 59.8 (9.64)                 | 56.2 (8.12)                | 57.9 (9.00)               |
| Median [Min, Max]        | 62.5 [36.0, 78.3]           | 56.5 [39.4, 70.2]          | 58.0 [36.0, 78.3]         |
| Missing                  | 14 (33.3%)                  | 14 (32.6%)                 | 28 (32.9%)                |

Supplementary Table 3

| id               | Best | Confire | binary | Resp | Enrollment | IC Level | TC Level | Immune | ph | FM | One       | mu | Sex | Race     | Intravesical | Baseline    | EC    | Tobacco | U <sub>2</sub> | Met | Disease   | Sample    | age       | Tissue | Received | pl            | Sample | coll | Neoantigen | size | Factor | OS_time | OS | Lund    | Lund2         | TCGA | Subr    | CANCER_ | ONCOTREE_CODE |      |
|------------------|------|---------|--------|------|------------|----------|----------|--------|----|----|-----------|----|-----|----------|--------------|-------------|-------|---------|----------------|-----|-----------|-----------|-----------|--------|----------|---------------|--------|------|------------|------|--------|---------|----|---------|---------------|------|---------|---------|---------------|------|
| SAMf2ce197162ce  | NE   | NA      | IC1    | IC1  | TC1        | TC1      | NA       |        | 3  | M  | WHITE     | N  | 0   | NEVER    | Liver        | 1-2         | years | ureter  | Y              | Y   | 0.5686275 | 1.3617619 | 1.5770021 | 1      | MS2a2    | Genomical     | IV     |      |            |      |        |         | 1  | MS2a2   | Genomical     | IV   | Bladder | Ca      | BLCA          |      |
| SAM6988d8476b934 | NE   | NA      | IC1    | IC1  | TC0        | TC0      | excluded |        | 6  | F  | WHITE     | N  | 1   | NEVER    | Visceral     | (less than) | 1     | bladder | Y              | Y   | 1.0196078 | 1.2344059 | 0.4271047 | 1      | MS2b2.2  | Basal/SCC-IV  |        |      |            |      |        |         | 1  | MS2b2.2 | Basal/SCC-IV  |      |         | Bladder | Ca            | BLCA |
| SAMe1b27bc16435  | PR   | CR/PR   | IC2    | IC2+ | TC0        | TC0      | excluded |        | 5  | M  | WHITE     | N  | 0   | PREVIOUS | Visceral     | more than   | 2     | kidney  | Y              | Y   | 1.4117647 | 0.5555118 | 24.180698 | 0      | MS2a1    | Genomical     | I      |      |            |      |        |         | 0  | MS2a1   | Genomical     | I    |         | Bladder | Ca            | BLCA |
| SAM85e41e76339   | NE   | NA      | IC1    | IC1  | TC1        | TC1      | inflamed |        | 10 | M  | WHITE     | N  | 2   | PREVIOUS | Visceral     | (less than) | 1     | bladder | N              | NA  | 1.254902  | 1.1647357 | 0.62423   | 1      | MS2b2.2  | Basal/SCC-IV  |        |      |            |      |        |         | 1  | MS2b2.2 | Basal/SCC-IV  |      |         | Bladder | Ca            | BLCA |
| SAMf275eb859a39  | PR   | CR/PR   | IC1    | IC1  | TC0        | TC0      | excluded |        | 9  | M  | BLACK ORY | N  | 0   | PREVIOUS | Visceral     | 1-2         | years | bladder | Y              | Y   | NA        | 1.4834422 | 24.476386 | 0      | MS1a     | UroA          | I      |      |            |      |        |         | 0  | MS1a    | UroA          | I    |         | Bladder | Ca            | BLCA |
| SAM70M9ec7f001   | PD   | SD/     | PD/    | IC1  | IC1        | TC0      | excluded | NA     |    | M  | WHITE     | N  | 1   | NEVER    | Liver        | more than   | 2     | bladder | Y              | Y   | NA        | 0.6498134 | 4.6324435 | 1      | MS2b1    | Infiltrated   | II     |      |            |      |        |         | 1  | MS2b1   | Infiltrated   | II   |         | Bladder | Ca            | BLCA |
| SAM4305ab968890  | PD   | SD/     | PD/    | IC0  | IC0        | TC0      | desert   |        | 12 | M  | WHITE     | N  | 1   | PREVIOUS | Liver        | more than   | 2     | bladder | Y              | N   | 0.3921569 | 1.3451211 | 1.412731  | 1      | MS1b     | UroA          | I      |      |            |      |        |         | 1  | MS1b    | UroA          | I    |         | Bladder | Ca            | BLCA |
| SAMc0f18fcec2acd | PD   | SD/     | PD/    | IC0  | IC0        | TC0      | excluded | NA     |    | M  | WHITE     | N  | 0   | PREVIOUS | Visceral     | more than   | 2     | kidney  | Y              | Y   | NA        | 1.7799627 | 16.229979 | 1      | MS1a     | UroA          | I      |      |            |      |        |         | 1  | MS1a    | UroA          | I    |         | Bladder | Ca            | BLCA |
| SAMb2f1d0e54ecc  | PR   | CR/     | PR/    | IC2  | IC2+       | TC2+     | desert   | NA     |    | M  | WHITE     | N  | 1   | PREVIOUS | Visceral     | (less than) | 1     | bladder | Y              | N   | 0.8627451 | 0.7984888 | 11.400411 | 1      | MS2b1    | Infiltrated   | IV     |      |            |      |        |         | 1  | MS2b1   | Infiltrated   | IV   |         | Bladder | Ca            | BLCA |
| SAMc4675f394a1   | PD   | SD/     | PD/    | IC0  | IC0        | TC0      | NA       | NA     |    | M  | WHITE     | N  | 1   | PREVIOUS | Liver        | (less than) | 1     | liver   | Y              | Y   | NA        | 1.199407  | 3.1211499 | 1      | MS1a     | UroA          | I      |      |            |      |        |         | 1  | MS1a    | UroA          | I    |         | Bladder | Ca            | BLCA |
| SAM49f9b2e57aa5  | PD   | SD/     | PD/    | IC0  | IC0        | TC0      | excluded |        | 5  | M  | WHITE     | Y  | 1   | PREVIOUS | Liver        | 1-2         | years | kidney  | Y              | Y   | 1.4509804 | 0.9977972 | 7.4579055 | 1      | MS1b     | UroA          | I      |      |            |      |        |         | 1  | MS1b    | UroA          | I    |         | Bladder | Ca            | BLCA |
| SAM2e7aa8fa0ab3  | PD   | SD/     | PD/    | IC1  | IC1        | TC0      | excluded |        | 14 | M  | WHITE     | N  | 1   | PREVIOUS | Visceral     | (less than) | 1     | kidney  | N              | NA  | 2.7058824 | 1.2795319 | 7.7207392 | 1      | MS1b     | UroA          | II     |      |            |      |        |         | 1  | MS1b    | UroA          | II   |         | Bladder | Ca            | BLCA |
| SAMd0e47bc700b0  | NE   | NA      | IC0    | IC0  | TC0        | TC0      | desert   |        | 5  | M  | WHITE     | N  | 1   | NEVER    | Visceral     | 1-2         | years | kidney  | Y              | Y   | NA        | 0.9483392 | 0.8870637 | 1      | MS1b     | UroA          | II     |      |            |      |        |         | 1  | MS1b    | UroA          | II   |         | Bladder | Ca            | BLCA |
| SAMd13c42e264a2a | PD   | SD/     | PD/    | IC2  | IC2+       | TC2+     | inflamed |        | 19 | M  | WHITE     | N  | 1   | PREVIOUS | Visceral     | (less than) | 1     | bladder | Y              | Y   | 3.2352941 | 0.7913531 | 7.3264887 | 1      | MS2b2.2  | Basal/SCC-III |        |      |            |      |        |         | 1  | MS2b2.2 | Basal/SCC-III |      |         | Bladder | Ca            | BLCA |
| SAMd07124354cc   | CR   | CR/     | PR/    | IC0  | IC0        | TC0      | desert   |        | 4  | F  | WHITE     | N  | 0   | NEVER    | NA           | 1-2         | years | ureter  | N              | NA  | 0.7647059 | 1.4311124 | 23.523614 | 0      | MS2b2.2  | Basal/SCC-III |        |      |            |      |        |         | 0  | MS2b2.2 | Basal/SCC-III |      |         | Bladder | Ca            | BLCA |
| SAM36d87392593b  | SD   | SD/     | PD/    | IC2  | IC2+       | TC2+     | excluded |        | 7  | M  | WHITE     | N  | 0   | NEVER    | Visceral     | 1-2         | years | ureter  | Y              | Y   | 0.3529412 | 1.0006591 | 23.687885 | 0      | MS2b2.2  | Basal/SCC-III |        |      |            |      |        |         | 0  | MS2b2.2 | Basal/SCC-III |      |         | Bladder | Ca            | BLCA |
| SAM4edcbe45817b3 | NE   | NA      | IC2    | IC2+ | TC2+       | TC2+     | inflamed |        | 26 | M  | WHITE     | N  | 1   | PREVIOUS | NA           | (less than) | 1     | bladder | Y              | Y   | 3.6862745 | 0.9075378 | 1.0513347 | 1      | MS2b2.2  | Basal/SCC-III |        |      |            |      |        |         | 1  | MS2b2.2 | Basal/SCC-III |      |         | Bladder | Ca            | BLCA |
| SAM36a9225b0222  | SD   | SD/     | PD/    | IC2  | IC2+       | TC2+     | inflamed |        | 1  | M  | ASIAN     | N  | 1   | PREVIOUS | Liver        | 1-2         | years | bladder | Y              | N   | 0.6078431 | 1.6812841 | 23.819302 | 0      | MS2b1    | Infiltrated   | IV     |      |            |      |        |         | 0  | MS2b1   | Infiltrated   | IV   |         | Bladder | Ca            | BLCA |
| SAMe7b16c015192  | PD   | SD/     | PD/    | IC2  | IC2+       | TC0      | inflamed |        | 7  | M  | WHITE     | N  | 1   | PREVIOUS | Visceral     | (less than) | 1     | kidney  | N              | NA  | 1.372549  | 1.2088202 | 3.1211499 | 1      | MS2b2.1  | UroB          | III    |      |            |      |        |         | 1  | MS2b2.1 | UroB          | III  |         | Bladder | Ca            | BLCA |
| SAMd6dd7ad1d797d | PD   | SD/     | PD/    | IC1  | IC1        | TC2+     | NA       | NA     |    | M  | WHITE     | N  | 1   | PREVIOUS | Visceral     | 1-2         | years | bladder | Y              | Y   | 3.5686275 | 1.249421  | 19.285421 | 1      | MS2b2.1  | Basal/SCC-III |        |      |            |      |        |         | 1  | MS2b2.1 | Basal/SCC-III |      |         | Bladder | Ca            | BLCA |
| SAMe0d625a50eb8  | SD   | SD/     | PD/    | IC0  | IC0        | TC0      | desert   |        | 3  | F  | WHITE     | N  | 1   | NEVER    | Visceral     | 1-2         | years | bladder | Y              | N   | 0.2941176 | 1.0076896 | 13.273101 | 1      | MS2b1    | Infiltrated   | I      |      |            |      |        |         | 1  | MS2b1   | Infiltrated   | I    |         | Bladder | Ca            | BLCA |
| SAM18039827e1b9  | PD   | SD/     | PD/    | IC0  | IC0        | TC0      | desert   |        | 15 | M  | WHITE     | N  | 1   | NEVER    | Visceral     | (less than) | 1     | bladder | Y              | N   | NA        | 1.9184914 | 1.4784394 | 1      | MS1b     | UroA          | II     |      |            |      |        |         | 1  | MS1b    | UroA          | II   |         | Bladder | Ca            | BLCA |
| SAM681e4bf7c85   | PR   | CR/     | PR/    | IC2  | IC2+       | TC0      | excluded |        | 7  | M  | WHITE     | N  | 0   | NEVER    | NA           | 1-2         | years | bladder | Y              | Y   | 1.8627451 | 1.5863464 | 23.392197 | 0      | MS1b     | UroA          | I      |      |            |      |        |         | 0  | MS1b    | UroA          | I    |         | Bladder | Ca            | BLCA |
| SAMe692536a795a  | PD   | SD/     | PD/    | IC1  | IC1        | TC0      | desert   |        | 10 | M  | WHITE     | Y  | 1   | PREVIOUS | NA           | 1-2         | years | ureter  | Y              | Y   | NA        | 1.0142605 | 5.650924  | 1      | MS2b1    | Infiltrated   | II     |      |            |      |        |         | 1  | MS2b1   | Infiltrated   | II   |         | Bladder | Ca            | BLCA |
| SAM9a2c3e06fb3   | PD   | SD/     | PD/    | IC1  | IC1        | TC0      | inflamed |        | 4  | M  | WHITE     | N  | 0   | PREVIOUS | Visceral     | more than   | 2     | bladder | Y              | Y   | 0.8627451 | 1.6066083 | 5.650924  | 1      | MS2b1    | Infiltrated   | II     |      |            |      |        |         | 1  | MS2b1   | Infiltrated   | II   |         | Bladder | Ca            | BLCA |
| SAM557dde1b9f3e  | PD   | SD/     | PD/    | IC1  | IC1        | TC0      | excluded |        | 5  | M  | WHITE     | N  | 1   | NEVER    | Visceral     | more than   | 2     | ureter  | Y              | Y   | NA        | 0.5831862 | 6.7022587 | 1      | MS1a     | UroA          | I      |      |            |      |        |         | 1  | MS1a    | UroA          | I    |         | Bladder | Ca            | BLCA |
| SAMb8f13a0525ab6 | NE   | NA      | IC2    | IC2+ | TC0        | TC0      | excluded |        | 4  | M  | WHITE     | N  | 0   | NEVER    | Liver        | 1-2         | years | kidney  | Y              | Y   | 0.5294118 | 0.97032   | 2.6940452 | 1      | MS2b2.2  | Basal/SCC-IV  |        |      |            |      |        |         | 1  | MS2b2.2 | Basal/SCC-IV  |      |         | Bladder | Ca            | BLCA |
| SAM23aa15d4a0b0  | PD   | SD/     | PD/    | IC1  | IC1        | TC0      | excluded |        | 5  | F  | WHITE     | N  | 1   | NEVER    | Liver        | more than   | 2     | kidney  | Y              | Y   | 0.3333333 | 0.9672663 | 5.7166324 | 1      | MS2a1    | Genomical     | III    |      |            |      |        |         | 1  | MS2a1   | Genomical     | III  |         | Bladder | Ca            | BLCA |
| SAM468a9e1dc821  | PD   | SD/     | PD/    | IC2  | IC2+       | TC0      | desert   |        | 8  | M  | WHITE     | N  | 1   | PREVIOUS | Visceral     | (less than) | 1     | NA      | Y              | N   | NA        | 0.7372686 | 3.8767967 | 1      | MS2b2.1  | UroB          | IV     |      |            |      |        |         | 1  | MS2b2.1 | UroB          | IV   |         | Bladder | Ca            | BLCA |
| SAM81b71522417a  | PD   | SD/     | PD/    | IC0  | IC0        | TC0      | NA       |        | 7  | F  | WHITE     | N  | 0   | PREVIOUS | Liver        | (less than) | 1     | bladder | N              | NA  | 1.0784314 | 1.7056612 | 2.1355236 | 1      | MS1b     | UroA          | I      |      |            |      |        |         | 1  | MS1b    | UroA          | I    |         | Bladder | Ca            | BLCA |
| SAM6cb230f208a8  | PR   | CR/     | PR/    | IC0  | IC0        | TC1      | desert   |        | 20 | M  | WHITE     | N  | 0   | PREVIOUS | Visceral     | 1-2         | years | lung    | Y              | Y   | 1.0392157 | 0.7723566 | 23.227926 | 0      | MS1b     | UroA          | I      |      |            |      |        |         | 0  | MS1b    | UroA          | I    |         | Bladder | Ca            | BLCA |
| SAM0684a4734b1   | PR   | CR/     | PR/    | IC0  | IC0        | TC0      | NA       |        | 6  | F  | WHITE     | N  | 1   | PREVIOUS | Visceral     | (less than) | 1     | bladder | N              | NA  | 0.9215686 | 1.3611922 | 23.26078  | 0      | MS1b     | UroA          | I      |      |            |      |        |         | 0  | MS1b    | UroA          | I    |         | Bladder | Ca            | BLCA |
| SAMb963dad93cfd  | PD   | SD/     | PD/    | IC2  | IC2+       | TC2+     | excluded |        | 8  | M  | OTHER     | N  | 1   | CURRENT  | Liver        | 1-2         | years | bladder | Y              | Y   | 0.8823529 | 1.6936178 | 2.7597536 | 1      | MS2b2.2  | Basal/SCC-IV  |        |      |            |      |        |         | 1  | MS2b2.2 | Basal/SCC-IV  |      |         | Bladder | Ca            | BLCA |
| SAM9ca9e8536d2b1 | SD   | SD/     | PD/    | IC1  | IC1        | TC1      | NA       |        | 3  | M  | WHITE     | N  | 0   | PREVIOUS | LN Only      | 1-2         | years | bladder | N              | NA  | 0.3529412 | 0.8461297 | 21.848049 | 0      | MS2b1    | Infiltrated   | III    |      |            |      |        |         | 0  | MS2b1   | Infiltrated   | III  |         | Bladder | Ca            | BLCA |
| SAM9f814c22bdb   | SD   | SD/     | PD/    | IC1  | IC1        | TC0      | desert   |        | 6  | F  | WHITE     | N  | 0   | PREVIOUS | NA           | (less than) | 1     | bladder | N              | NA  | 0.4313725 | 0.7713971 | 19.12115  | 1      | MS2b1    | Infiltrated   | III    |      |            |      |        |         | 1  | MS2b1   | Infiltrated   | III  |         | Bladder | Ca            | BLCA |
| SAMb8bc7957e264  | PD   | SD/     | PD/    | IC1  | IC1        | TC0      | desert   |        | 9  | M  | WHITE     | Y  | 1   | NEVER    | Visceral     | 1-2         | years | bladder | Y              | Y   | NA        | 1.7013938 | 4.1724846 | 1      | MS1b     | UroA          | I      |      |            |      |        |         | 1  | MS1b    | UroA          | I    |         | Bladder | Ca            | BLCA |
| SAM7fb698751     |      |         |        |      |            |          |          |        |    |    |           |    |     |          |              |             |       |         |                |     |           |           |           |        |          |               |        |      |            |      |        |         |    |         |               |      |         |         |               |      |

|                  |    |       |     |      |      |          |      |           |           |            |            |               |               |            |    |           |           |           |           |                 |                 |                 |
|------------------|----|-------|-----|------|------|----------|------|-----------|-----------|------------|------------|---------------|---------------|------------|----|-----------|-----------|-----------|-----------|-----------------|-----------------|-----------------|
| SAM0ce9c983b20f  | PD | SD/PD | IC2 | IC2+ | TC0  | excluded | 9 M  | WHITE     | N         | 0 NEVER    | NA         | 1-2 years     | ureter        | Y          | Y  | NA        | 0.8863618 | 6.6036961 | 1 MS2b2   | Basal/SCC-III   | Bladder Ca/BLCA |                 |
| SAMa1e62d332c1d  | SD | SD/SD | IC2 | IC2+ | TC0  | inflamed | 15 F | WHITE     | Y         | 0 PREVIOUS | Visceral   | 1-2 years     | bladder       | Y          | N  | 0.9215686 | 1.3140227 | 10.579055 | 1 MS2a1   | GenomicalIII    | Bladder Ca/BLCA |                 |
| SAM61ba919b001   | SD | SD/PD | IC0 | IC1  | TC0  | desert   | NA   | F         | WHITE     | N          | 1 NEVER    | Visceral      | (less than) 1 | lymph node | Y  | N         | NA        | 0.9398294 | 15.605749 | 1 MS2b1         | Infiltrated I   | Bladder Ca/BLCA |
| SAM97a00e929b9   | PR | CR/PR | IC2 | IC2+ | TC0  | excluded | 18 M | OTHER     | N         | 0 PREVIOUS | Liver      | (less than) 1 | kidney        | N          | NA | 2.8627451 | 0.7102569 | 12.714579 | 0 MS2a1   | GenomicalIII    | Bladder Ca/BLCA |                 |
| SAM22828939632f  | PD | SD/SD | IC1 | IC1  | TC0  | excluded | 8 F  | BLACK ORN | N         | 1 NEVER    | Liver      | more than 2   | bladder       | Y          | N  | 0.4509804 | 0.8918077 | 7.8850103 | 1 MS2b1   | Infiltrated IV  | Bladder Ca/BLCA |                 |
| SAM9539a4f19ebc  | SD | SD/PD | IC0 | IC0  | TC0  | desert   | NA   | M         | WHITE     | N          | 0 NEVER    | Liver         | (less than) 1 | bladder    | Y  | N         | 0.4313725 | 1.4680234 | 7.9507187 | 1 MS1b          | UroA I          | Bladder Ca/BLCA |
| SAM36851bc8b9a9e | SD | SD/PD | IC1 | IC1  | TC2+ | excluded | 7 M  | WHITE     | N         | 1 PREVIOUS | Visceral   | (less than) 1 | bladder       | Y          | Y  | 0.3333333 | 0.7397069 | 3.5482546 | 1 MS1b    | UroA I          | Bladder Ca/BLCA |                 |
| SAM297c0301e861  | PD | SD/PD | IC1 | IC1  | TC2+ | excluded | 1 M  | WHITE     | Y         | 1 NEVER    | Liver      | more than 2   | bladder       | Y          | N  | NA        | 1.0851175 | 0.8021355 | 1 MS2b1   | Infiltrated IV  | Bladder Ca/BLCA |                 |
| SAM1fa66cb7fc48  | PD | SD/PD | IC2 | IC2+ | TC0  | inflamed | 8 M  | WHITE     | Y         | 1 CURRENT  | Visceral   | (less than) 1 | bladder       | Y          | Y  | 1.2352941 | 1.3259056 | 22.735113 | 0 MS1b    | UroA I          | Bladder Ca/BLCA |                 |
| SAM075e037d95bc  | PR | CR/PR | IC1 | IC1  | TC0  | excluded | 11 M | WHITE     | Y         | 0 NEVER    | Visceral   | more than 2   | kidney        | Y          | Y  | 0.745098  | 0.7905631 | 21.322382 | 0 MS1b    | UroA I          | Bladder Ca/BLCA |                 |
| SAM62a2e0c39b9e  | PD | SD/PD | IC1 | IC1  | TC0  | excluded | NA   | M         | BLACK ORN | N          | 1 CURRENT  | LN Only       | (less than) 1 | lymph node | Y  | Y         | NA        | 1.0879611 | 22.110883 | 0 MS1b          | UroA I          | Bladder Ca/BLCA |
| SAMcabb6d58ff55  | SD | SD/PD | IC2 | IC2+ | TC2+ | inflamed | 11 F | BLACK ORN | N         | 1 NEVER    | Visceral   | (less than) 1 | lung          | Y          | N  | 1.3529412 | 0.8988153 | 20.271047 | 0 MS2b2.2 | Basal/SCC-IV    | Bladder Ca/BLCA |                 |
| SAM716f54e46864  | SD | SD/PD | IC2 | IC2+ | TC0  | NA       | 6 M  | WHITE     | N         | 1 NEVER    | Liver      | 1-2 years     | kidney        | Y          | Y  | 1.5686275 | 1.3567781 | 21.190965 | 0 MS2b1   | Infiltrated II  | Bladder Ca/BLCA |                 |
| SAMeff2ce356ccb  | PD | SD/PD | IC0 | IC0  | TC0  | desert   | 14 M | WHITE     | Y         | 0 NEVER    | Visceral   | more than 2   | ureter        | Y          | Y  | NA        | 1.0777822 | 0.8021355 | 1 MS1b    | UroA I          | Bladder Ca/BLCA |                 |
| SAM110501d0eebd  | PD | SD/PD | IC1 | IC1  | TC0  | desert   | 21 M | WHITE     | Y         | 1 NEVER    | LN Only    | more than 2   | bladder       | Y          | Y  | 3.5294118 | 1.1752249 | 4.2710472 | 1 MS2a1   | GenomicalIII    | Bladder Ca/BLCA |                 |
| SAM2e9a60b1b250  | CR | CR/PR | IC2 | IC2+ | TC2+ | NA       | 18 M | WHITE     | N         | 1 PREVIOUS | NA         | 1-2 years     | bladder       | Y          | Y  | 1.7647059 | 0.4782786 | 22.143737 | 0 MS2b2.2 | Basal/SCC-IV    | Bladder Ca/BLCA |                 |
| SAM0e0ef41a6c8b  | PD | SD/PD | IC0 | IC0  | TC0  | desert   | 5 M  | WHITE     | Y         | 0 NEVER    | Visceral   | (less than) 1 | NA            | Y          | N  | 0.9607843 | 0.9862958 | 9.5605749 | 1 MS1b    | UroA I          | Bladder Ca/BLCA |                 |
| SAMd636e3461955  | PD | SD/PD | IC1 | IC1  | TC0  | inflamed | NA   | M         | WHITE     | Y          | 1 PREVIOUS | LN Only       | 1-2 years     | bladder    | Y  | Y         | 0.1960784 | 0.9338649 | 10.480493 | 1 MS2b1         | Infiltrated IV  | Bladder Ca/BLCA |
| SAMe712352fb82a  | PR | CR/PR | IC0 | IC0  | TC0  | desert   | NA   | M         | WHITE     | N          | 0 PREVIOUS | NA            | (less than) 1 | bladder    | Y  | Y         | NA        | 1.6407904 | 22.110883 | 0 MS2a1         | GenomicalIII    | Bladder Ca/BLCA |
| SAM30b5c6c54c7   | CR | CR/PR | IC2 | IC2+ | TC0  | excluded | 6 F  | WHITE     | N         | 1 PREVIOUS | LN Only    | 1-2 years     | bladder       | Y          | N  | NA        | 0.7547023 | 9.2648871 | 1 MS2b2.2 | Basal/SCC-IV    | Bladder Ca/BLCA |                 |
| SAMd98ba60a070f  | PD | SD/PD | IC0 | IC0  | TC0  | desert   | 8 M  | WHITE     | Y         | 1 PREVIOUS | Liver      | (less than) 1 | ureter        | Y          | N  | 0.7254902 | 1.2281135 | 2.0698152 | 1 MS1a    | UroA III        | Bladder Ca/BLCA |                 |
| SAM8e8ef2368dfa  | PD | SD/PD | IC0 | IC0  | TC0  | desert   | 6 M  | WHITE     | N         | 0 CURRENT  | Visceral   | (less than) 1 | kidney        | Y          | N  | 0.5098039 | 1.0427453 | 4.5010267 | 1 MS2b1   | Infiltrated IV  | Bladder Ca/BLCA |                 |
| SAM08ce2fa88f2   | SD | SD/PD | IC0 | IC0  | TC0  | excluded | NA   | F         | WHITE     | Y          | 1 CURRENT  | Visceral      | more than 2   | bladder    | Y  | Y         | NA        | 0.6394718 | 22.110883 | 0 MS1b          | UroA I          | Bladder Ca/BLCA |
| SAMB4c7a001537d  | PD | SD/PD | IC1 | IC1  | TC1  | inflamed | 5 M  | WHITE     | N         | 1 PREVIOUS | Visceral   | 1-2 years     | kidney        | Y          | Y  | NA        | 0.8158505 | 3.1868583 | 1 MS1b    | UroA I          | Bladder Ca/BLCA |                 |
| SAMd947610629d   | PD | SD/PD | IC0 | IC0  | TC0  | desert   | 5 M  | WHITE     | N         | 0 PREVIOUS | Visceral   | 1-2 years     | bladder       | Y          | N  | NA        | 0.7539059 | 9.0349076 | 1 MS2b1   | Infiltrated I   | Bladder Ca/BLCA |                 |
| SAM943df5cf15df  | PD | SD/PD | IC1 | IC1  | TC0  | desert   | 5 M  | WHITE     | N         | 1 PREVIOUS | Visceral   | (less than) 1 | bladder       | Y          | N  | 0.1176471 | 0.9846785 | 2.1355236 | 1 MS2b2.2 | Basal/SCC-III   | Bladder Ca/BLCA |                 |
| SAM31f41dd0d6ca  | SD | SD/PD | IC1 | IC1  | TC0  | NA       | NA   | F         | WHITE     | Y          | 1 PREVIOUS | NA            | (less than) 1 | lymph node | Y  | N         | 0.7058824 | 1.2730064 | 8.2792608 | 1 MS2b1.2       | UroB I          | Bladder Ca/BLCA |
| SAMb3c02294ab4   | PR | CR/PR | IC0 | IC0  | TC1  | desert   | 18 M | WHITE     | Y         | 1 PREVIOUS | Visceral   | (less than) 1 | other         | Y          | N  | NA        | 1.0655559 | 22.406571 | 0 MS2a1   | GenomicalIII    | Bladder Ca/BLCA |                 |
| SAM39eb946504d   | PD | SD/PD | IC2 | IC2+ | TC0  | excluded | 6 M  | WHITE     | N         | 1 PREVIOUS | Visceral   | 1-2 years     | bladder       | Y          | Y  | NA        | 1.0833727 | 17.905544 | 1 MS2b2.1 | Basal/SCC-III   | Bladder Ca/BLCA |                 |
| SAM62fb1388e871  | PD | SD/PD | IC1 | IC1  | TC0  | NA       | 5 F  | WHITE     | N         | 0 PREVIOUS | Visceral   | more than 2   | kidney        | Y          | N  | 0.7843137 | 1.2882409 | 22.505133 | 0 MS2a1   | GenomicalIV     | Bladder Ca/BLCA |                 |
| SAMe0da5d4866d   | PD | SD/PD | IC1 | IC1  | TC2+ | desert   | 5 M  | WHITE     | N         | 1 NEVER    | Visceral   | (less than) 1 | bladder       | Y          | Y  | 1.1764706 | 1.630405  | 9.4948665 | 1 MS2a2   | GenomicalIV     | Bladder Ca/BLCA |                 |
| SAMe7bcab05402e  | SD | SD/PD | IC0 | IC0  | TC0  | NA       | NA   | M         | WHITE     | N          | 1 PREVIOUS | Visceral      | 1-2 years     | kidney     | Y  | N         | NA        | 1.4906901 | 7.9178645 | 1 MS2b1         | Infiltrated I   | Bladder Ca/BLCA |
| SAM2570ff4aae6e  | PR | CR/PR | IC2 | IC2+ | TC0  | inflamed | 12 F | WHITE     | N         | 1 CURRENT  | LN Only    | (less than) 1 | lymph node    | Y          | N  | 1.5294118 | 0.8515257 | 22.373717 | 0 MS2b1.2 | UroB III        | Bladder Ca/BLCA |                 |
| SAM2cb3f0f4e45e9 | PD | SD/PD | IC2 | IC2+ | TC2+ | inflamed | NA   | M         | WHITE     | N          | 1 PREVIOUS | Liver         | (less than) 1 | kidney     | Y  | N         | NA        | 1.1458599 | 10.184805 | 1 MS2b2.1       | Basal/SCC-III   | Bladder Ca/BLCA |
| SAM9448d858692c  | NE | NA    | IC2 | IC2+ | TC1  | inflamed | 8 M  | WHITE     | Y         | 1 PREVIOUS | Liver      | (less than) 1 | kidney        | Y          | N  | NA        | 0.9507997 | 2.036961  | 1 MS2b1   | Infiltrated II  | Bladder Ca/BLCA |                 |
| SAM4501e41e4751  | PD | SD/PD | IC1 | IC1  | TC1  | excluded | 6 M  | WHITE     | N         | 1 NEVER    | Liver      | 1-2 years     | bladder       | Y          | Y  | 0.9215686 | 1.3633497 | 11.170431 | 1 MS2b2.2 | Basal/SCC-III   | Bladder Ca/BLCA |                 |
| SAM714285adf612  | NE | NA    | IC2 | IC2+ | TC2+ | inflamed | 5 M  | WHITE     | N         | 1 NEVER    | Liver      | 1-2 years     | kidney        | Y          | Y  | 0.9803922 | 1.3310955 | 0.62423   | 1 MS2b1   | Infiltrated IV  | Bladder Ca/BLCA |                 |
| SAM5b57e47fcb3   | PD | SD/PD | IC2 | IC2+ | TC0  | NA       | 12 F | ASIAN     | N         | 1 NEVER    | Liver      | more than 2   | ureter        | Y          | Y  | NA        | 0.9778057 | 3.8439425 | 1 MS1b    | UroA I          | Bladder Ca/BLCA |                 |
| SAMae4ada274ed   | PD | SD/PD | IC0 | IC0  | TC0  | NA       | NA   | F         | WHITE     | Y          | 1 NEVER    | Liver         | (less than) 1 | bladder    | Y  | Y         | NA        | 1.4846168 | 4.9938398 | 1 MS2a2         | GenomicalIII    | Bladder Ca/BLCA |
| SAMd35318127278  | CR | CR/PR | IC1 | IC1  | TC1  | excluded | 62 M | WHITE     | Y         | 1 PREVIOUS | LN Only    | (less than) 1 | kidney        | N          | NA | 10.019608 | 1.7673386 | 21.585216 | 0 MS2a1   | GenomicalIII    | Bladder Ca/BLCA |                 |
| SAMa913c6139ce8  | SD | SD/PD | IC2 | IC2+ | TC0  | excluded | NA   | M         | WHITE     | N          | 0 NEVER    | Visceral      | (less than) 1 | kidney     | Y  | N         | 1.5294118 | 0.9422851 | 5.1252567 | 1 MS2b1         | Infiltrated II  | Bladder Ca/BLCA |
| SAM75142fcab9df  | PD | SD/PD | IC2 | IC2+ | TC0  | excluded | 7 F  | WHITE     | N         | 1 NEVER    | LN Only    | more than 2   | kidney        | Y          | Y  | 0.2745098 | 1.3678296 | 11.926078 | 1 MS2b1   | Infiltrated I   | Bladder Ca/BLCA |                 |
| SAMd697ba701077  | SD | SD/PD | IC0 | IC0  | TC0  | excluded | NA   | F         | WHITE     | Y          | 0 PREVIOUS | LN Only       | more than 2   | ureter     | Y  | Y         | NA        | 1.2206875 | 21.158111 | 1 MS1a          | UroA II         | Bladder Ca/BLCA |
| SAM1166a419a4e5a | PD | SD/PD | IC1 | IC1  | TC0  | excluded | 5 M  | WHITE     | N         | 1 PREVIOUS | Visceral   | 1-2 years     | bladder       | Y          | N  | 0.2745098 | 1.2723106 | 5.3880903 | 1 MS2b1   | Infiltrated IV  | Bladder Ca/BLCA |                 |
| SAM025b45c27e05  | PD | SD/PD | IC1 | IC1  | TC0  | desert   | 1 M  | WHITE     | N         | 0 PREVIOUS | Liver      | 1-2 years     | bladder       | Y          | Y  | 0.3137255 | 1.6488254 | 8.7720739 | 1 MS2b1   | Infiltrated III | Bladder Ca/BLCA |                 |
| SAMe07c4560772d  | PD | SD/PD | IC0 | IC0  | TC0  | desert   | 5 F  | OTHER     | Y         | 1 NEVER    | Visceral   | more than 2   | ureter        | Y          | Y  | 0.5490196 | 1.2838944 | 2.1026694 | 0 MS1b    | UroA I          | Bladder Ca/BLCA |                 |
| SAM2dc578e0165f  | NE | NA    | IC2 | IC2+ | TC2+ | excluded | 8 M  | ASIAN     | N         | 1 PREVIOUS | Visceral   | (less than) 1 | bladder       | Y          | Y  | NA        | 1.7651904 | 1.9712526 | 1 MS2a2   | GenomicalIV     | Bladder Ca/BLCA |                 |
| SAM3785587846cc  | NE | NA    | IC1 | IC1  | TC0  | NA       | 9 F  | WHITE     | Y         | 1 PREVIOUS | Liver      | 1-2 years     | ureter        | Y          | Y  | NA        | 1.118729  | 7.063655  | 1 MS1b    | UroA I          | Bladder Ca/BLCA |                 |
| SAM50f23d6a3ad   | CR | CR/PR | IC2 | IC2+ | TC2+ | inflamed | 19 M | NATIVE HN | N         | 0 PREVIOUS | NA         | (less than) 1 | other         | Y          | Y  | 0.6470588 | 1.0572023 | 21.38809  | 0 MS2b2.2 | Basal/SCC-IV    | Bladder Ca/BLCA |                 |
| SAM52500cabdd36  | SD | SD/PD | IC1 | IC1  | TC0  | excluded | 12 F | OTHER     | N         | 0 PREVIOUS | LN Only    | 1-2 years     | ureter        | Y          | Y  | 0.745098  | 0.7258085 | 20.468172 | 0 MS2a1   | GenomicalIII    | Bladder Ca/BLCA |                 |
| SAM114df63a65411 | PR | CR/PR | IC2 | IC2+ | TC2+ | excluded | 7 F  | WHITE     | N         | 0 PREVIOUS | Liver      | (less than) 1 | bladder       | Y          | Y  | 0.5686275 | 1.7362812 | 21.420945 | 0 MS1b    | UroA III        | Bladder Ca/BLCA |                 |
| SAMf3a9bec50099  | PD | SD/PD | IC2 | IC2+ | TC0  | excluded | 4 F  | ASIAN     | N         | 1 PREVIOUS | LN Only    | (less than) 1 | kidney        | Y          | Y  | NA        | 1.0534267 | 2.1026694 | 0 MS2b1   | Infiltrated II  | Bladder Ca/BLCA |                 |
| SAMffa5c7cad0e5  | PR | CR/PR | IC1 | IC1  | TC0  | desert   | 10 M | WHITE     | N         | 1 PREVIOUS | Visceral   | (less than) 1 | other         | Y          | NA | NA        | 0.8375501 | 15.540041 | 1 MS2b1   | Infiltrated IV  | Bladder Ca/BLCA |                 |
| SAMdab9ca8fb5dc  | PD | SD/PD | IC0 | IC0  | TC0  | excluded | 14 M | WHITE     | N         | 2 PREVIOUS | Liver      | (less than) 1 | bladder       | N          | NA | 2.9215686 | 1.5293273 | 0.1971253 | 0 MS1a    | UroA I          | Bladder Ca/BLCA |                 |
| SAM34430e08e5b   | PD | SD/PD | IC1 | IC1  | TC0  | NA       | NA   | M         | WHITE     | N          | 0 NEVER    | Visceral      | more than 2   | bladder    | Y  | Y         | NA        | 0.5676283 | 18.168378 | 0 MS2b1         | Infiltrated IV  | Bladder Ca/BLCA |
| SAM4b0175e8dbf6e | PD | SD/PD | IC1 | IC1  | TC0  | desert   | 6 M  | WHITE     | N         | 1 PREVIOUS | Liver      | more than 2   | kidney        | Y          | Y  | NA        | 1.0510243 | 2.0698152 | 1 MS2b1   | Infiltrated I   | Bladder Ca/BLCA |                 |
| SAM28c01545593   | SD | SD/PD | IC1 | IC1  | TC0  | desert   | 8 M  | WHITE     | Y         | 0 PREVIOUS | Visceral   |               |               |            |    |           |           |           |           |                 |                 |                 |

|                  |    |       |     |      |      |          |    |    |    |       |       |              |              |                         |                         |         |           |           |           |           |                |                |                |         |         |         |
|------------------|----|-------|-----|------|------|----------|----|----|----|-------|-------|--------------|--------------|-------------------------|-------------------------|---------|-----------|-----------|-----------|-----------|----------------|----------------|----------------|---------|---------|---------|
| SAM61b9d4d84c64  | SD | SD/PD | IC2 | IC2+ | TC0  | inflamed |    | 27 | M  | WHITE | N     | 1 PREVIOUS   | Liver        | 1-2 years               | bladder                 | Y       | Y         | 5.8823529 | 1.8784983 | 21.38809  | 0 MS2a1        | GenomicalII    | Bladder        | Ca/BLCA |         |         |
| SAM8a2cd0d59187  | NE | NA    | IC0 | IC0  | TC0  | NA       | NA |    | 3  | M     | WHITE | Y            | 1 NEVER      | Liver                   | (less than) 1NA         | Y       | N         | 0.2745098 | 0.8919493 | 2.825462  | 1 MS1b         | UroA           | III            | Bladder | Ca/BLCA |         |
| SAMecb132b0cdd2c | PD | SD/PD | IC1 | IC1  | TC2+ | desert   | NA |    | M  | WHITE | N     | 1 CURRENTLN  | Only         | (less than) 1lymph node | Y                       | N       | 0.8431373 | 1.3659038 | 2.5297741 | 1 MS2a2   | GenomicalIII   | Bladder        | Ca/BLCA        |         |         |         |
| SAMe97af0fecdf   | PD | SD/PD | IC1 | IC1  | TC0  | excluded |    |    | 3  | F     | WHITE | N            | 0 PREVIOUS   | Visceral                | (less than) 1bladder    | Y       | N         | 0.7058824 | 1.4030915 | 11.104723 | 1 MS1a         | UroA           | I              | Bladder | Ca/BLCA |         |
| SAMec3844cc0b9f  | PD | SD/PD | IC0 | IC0  | TC0  | NA       | NA |    | M  | WHITE | Y     | 1 PREVIOUS   | Visceral     | (less than) 1lymph node | Y                       | N       | NA        | 0.8918815 | 3.2197125 |           | 1 MS2b1        | Infiltrated I  |                | Bladder | Ca/BLCA |         |
| SAM73b653ac20d1  | NE | NA    | IC2 | IC2+ | TC2+ | inflamed |    |    | 3  | F     | WHITE | Y            | 1 NEVER      | Visceral                | (less than) 1other      | Y       | Y         | 0.9607843 | 1.3622658 | 1.8069815 | 1 MS2b2.2      | Basal/SCC-III  |                | Bladder | Ca/BLCA |         |
| SAMdca5c4fcd7fa  | PD | SD/PD | IC1 | IC1  | TC0  | excluded | NA |    | M  | WHITE | Y     | 1 PREVIOUSLN | Only         | more than 2kidney       | Y                       | N       | 1.4313725 | 1.2786817 | 6.2422998 | 1 MS2b1   | Infiltrated II |                | Bladder        | Ca/BLCA |         |         |
| SAMdad5c29d4c105 | PD | SD/PD | IC1 | IC1  | TC0  | excluded |    |    | 5  | M     | WHITE | N            | 1 CURRENT    | Visceral                | more than 2bladder      | Y       | Y         | 0.6666667 | 1.5307862 | 2.4312115 | 1 MS1b         | UroA           | II             | Bladder | Ca/BLCA |         |
| SAMa424c75831b4  | PD | SD/PD | IC2 | IC2+ | TC0  | NA       |    |    | 6  | M     | WHITE | N            | 1 PREVIOUS   | Visceral                | 1-2 years               | bladder | Y         | N         | 0.6862745 | 0.7761418 | 3.5482546      | 1 MS1b         | UroA           | II      | Bladder | Ca/BLCA |
| SAM28687037e4ff  | SD | SD/PD | IC2 | IC2+ | TC2+ | inflamed |    |    | 6  | M     | WHITE | N            | 0 PREVIOUS   | Visceral                | (less than) 1kidney     | Y       | Y         | 0.5686275 | 1.5087893 | 21.585216 | 0 MS2b2.2      | Basal/SCC-III  |                | Bladder | Ca/BLCA |         |
| SAMe50d15fde368  | PR | CR/PR | IC1 | IC1  | TC0  | desert   |    |    | 9  | F     | WHITE | Y            | 1 PREVIOUS   | Visceral                | 1-2 years               | bladder | Y         | Y         | 2.1764706 | 1.7006513 | 18.89117       | 0 MS1b         | UroA           | I       | Bladder | Ca/BLCA |
| SAM45e8c6412c66  | PD | SD/PD | IC1 | IC1  | TC2+ | inflamed |    |    | 5  | M     | WHITE | N            | 1 PREVIOUSLN | Only                    | (less than) 1bladder    | Y       | N         | 1.3921569 | 1.2979272 | 3.4825462 | 1 MS2b2.2      | Basal/SCC-III  |                | Bladder | Ca/BLCA |         |
| SAM8533c5c261d6  | PR | CR/PR | IC0 | IC0  | TC0  | desert   |    |    | 5  | M     | WHITE | N            | 0 PREVIOUS   | Visceral                | 1-2 years               | bladder | Y         | N         | 1.7254902 | 1.5230773 | 12.813142      | 1 MS1b         | UroA           | I       | Bladder | Ca/BLCA |
| SAMaaf505c3c6f93 | PR | CR/PR | IC1 | IC1  | TC0  | excluded |    |    | 15 | M     | WHITE | N            | 1 PREVIOUSLN | Only                    | more than 2kidney       | Y       | Y         | 1.7254902 | 1.5382453 | 20.566735 | 0 MS1b         | UroA           | I              | Bladder | Ca/BLCA |         |
| SAM73663ce4a96c  | CR | CR/PR | IC2 | IC2+ | TC0  | excluded | NA |    | M  | WHITE | N     | 0 PREVIOUSLN | Only         | (less than) 1kidney     | N                       | NA      | NA        | 0.7961654 | 21.256674 |           | 0 MS1b         | UroA           | I              | Bladder | Ca/BLCA |         |
| SAM0bb3428bd13   | PD | SD/PD | IC0 | IC0  | TC0  | NA       | NA |    | F  | WHITE | N     | 1 NEVER      | Visceral     | (less than) 1lymph node | Y                       | N       | NA        | 1.0187495 | 2.2340862 |           | 1 MS2b1        | Infiltrated II |                | Bladder | Ca/BLCA |         |
| SAM3330c036df0   | PD | SD/PD | IC1 | IC1  | TC0  | NA       |    |    | 2  | M     | WHITE | N            | 0 NEVER      | LN Only                 | (less than) 1lymph node | Y       | N         | NA        | 1.1405114 | 19.186858 |                | 0 MS2b1        | Infiltrated IV |         | Bladder | Ca/BLCA |
| SAM0a7c2091dd56  | PD | SD/PD | IC2 | IC2+ | TC1  | excluded |    |    | 8  | M     | WHITE | N            | 1 NEVER      | Visceral                | (less than) 1bladder    | Y       | N         | 1.2745098 | 0.9376758 | 2.6283368 | 1 MS2b2.2      | Basal/SCC-III  |                | Bladder | Ca/BLCA |         |
| SAM7bf231634c9   | SD | SD/PD | IC2 | IC2+ | TC2+ | NA       | NA |    | M  | WHITE | N     | 1 PREVIOUS   | Visceral     | (less than) 1ureter     | Y                       | Y       | 0.7254902 | 1.2271864 | 10.250513 | 1 MS2b2.2 | Basal/SCC-III  |                | Bladder        | Ca/BLCA |         |         |
| SAM5d1df45207f5  | PD | SD/PD | IC0 | IC0  | TC0  | NA       | NA |    | 12 | M     | WHITE | Y            | 1 NEVER      | Visceral                | (less than) 1bladder    | Y       | N         | NA        | 1.8381906 | 10.907598 |                | 1 MS1b         | UroA           | I       | Bladder | Ca/BLCA |
| SAMeb587a68006b  | SD | SD/PD | IC1 | IC1  | TC0  | NA       | NA |    | M  | WHITE | Y     | 1 PREVIOUSLN | Only         | 1-2 years               | bladder                 | N       | NA        | NA        | 1.2803134 | 20.698152 |                | 0 MS2b1        | Infiltrated II |         | Bladder | Ca/BLCA |
| SAM99a46b9ec27   | PD | SD/PD | IC0 | IC0  | TC0  | excluded |    |    | 5  | M     | WHITE | N            | 1 PREVIOUS   | Liver                   | 1-2 years               | kidney  | Y         | Y         | 0.7254902 | 1.9656916 | 3.613963       | 1 MS2b1        | Infiltrated I  |         | Bladder | Ca/BLCA |
| SAM1ac4c3dec297  | PD | SD/PD | IC1 | IC1  | TC0  | excluded |    |    | 2  | M     | WHITE | Y            | 1 PREVIOUS   | Liver                   | (less than) 1kidney     | N       | NA        | 0.6470588 | 1.0556986 | 5.5195072 | 1 MS1b         | UroA           | I              | Bladder | Ca/BLCA |         |
| SAM53c3c35b847   | PD | SD/PD | IC0 | IC0  | TC0  | NA       | NA |    | F  | WHITE | N     | 0 PREVIOUS   | Liver        | (less than) 1kidney     | Y                       | Y       | NA        | 0.9785279 | 6.7022587 |           | 1 MS2b1        | Infiltrated IV |                | Bladder | Ca/BLCA |         |
| SAM3c04cb914f3d  | PR | CR/PR | IC2 | IC2+ | TC0  | excluded |    |    | 17 | M     | WHITE | N            | 1 NEVER      | Liver                   | (less than) 1lymph node | Y       | N         | 1.4117647 | 1.2866232 | 17.281314 | 0 MS2b1        | Infiltrated I  |                | Bladder | Ca/BLCA |         |
| SAMe2a1820d4e6b  | CR | CR/PR | IC2 | IC2+ | TC0  | excluded | NA |    | M  | WHITE | N     | 0 NEVER      | LN Only      | (less than) 1bladder    | Y                       | Y       | NA        | 1.3177782 | 20.731006 |           | 0 MS2b1        | Infiltrated I  |                | Bladder | Ca/BLCA |         |
| SAM822b226466a1  | SD | SD/PD | IC0 | IC0  | TC0  | desert   | NA |    | M  | WHITE | Y     | 1 PREVIOUS   | Visceral     | 1-2 years               | other                   | Y       | N         | 1.0980392 | 1.2614358 | 17.281314 | 0 MS1b         | UroA           | I              | Bladder | Ca/BLCA |         |
| SAMabca151b01ea3 | PD | SD/PD | IC1 | IC1  | TC0  | excluded | NA |    | F  | WHITE | N     | 1 NEVER      | Liver        | (less than) 1bladder    | Y                       | N       | NA        | 0.74401   | 0.5585216 |           | 1 MS2b2.2      | Basal/SCC-IV   |                | Bladder | Ca/BLCA |         |
| SAMc1eb5e4988760 | CR | CR/PR | IC2 | IC2+ | TC0  | inflamed |    |    | 14 | M     | WHITE | N            | 0 PREVIOUS   | Liver                   | 1-2 years               | bladder | Y         | Y         | 2.2745098 | 1.2064794 | 21.059548      | 0 MS2b1        | Infiltrated I  |         | Bladder | Ca/BLCA |
| SAMe3210d3632b4  | PD | SD/PD | IC2 | IC2+ | TC2+ | inflamed |    |    | 17 | F     | WHITE | Y            | 1 NEVER      | LN Only                 | (less than) 1NA         | Y       | N         | 0.8627451 | 1.1802343 | 2.1683778 | 1 MS2b2.2      | Basal/SCC-III  |                | Bladder | Ca/BLCA |         |
| SAMb15ad09d4e24  | PD | SD/PD | IC2 | IC2+ | TC2+ | excluded |    |    | 4  | F     | WHITE | N            | 0 NEVER      | LN Only                 | (less than) 1bladder    | Y       | Y         | NA        | 1.1794569 | 3.8767977 |                | 1 MS2b1        | Infiltrated IV |         | Bladder | Ca/BLCA |
| SAM7893196e0e89  | PD | SD/PD | IC0 | IC0  | TC0  | NA       | NA |    | 5  | M     | ASIAN | N            | 1 PREVIOUS   | Visceral                | (less than) 1bladder    | Y       | N         | 0.9411765 | 1.5483966 | 2.661191  | 1 MS2b2.2      | Basal/SCC-III  |                | Bladder | Ca/BLCA |         |
| SAM346449fb81    | NE | NA    | IC2 | IC2+ | TC0  | inflamed | NA |    | M  | WHITE | Y     | 1 NEVER      | LN Only      | (less than) 1bladder    | Y                       | N       | 0.9803922 | 0.8950247 | 0.7556468 | 1 MS2b2.1 | UroB           | I              | Bladder        | Ca/BLCA |         |         |
| SAM961d04c42bd9  | PD | SD/PD | IC0 | IC0  | TC0  | excluded |    |    | 17 | M     | WHITE | N            | 1 CURRENT    | Visceral                | (less than) 1bladder    | Y       | N         | 1.7254902 | 1.5462051 | 5.8809035 | 1 MS2a1        | GenomicalI     |                | Bladder | Ca/BLCA |         |
| SAMB0d11ab9aa79  | PD | SD/PD | IC2 | IC2+ | TC0  | inflamed |    |    | 3  | F     | WHITE | N            | 0 NEVER      | Visceral                | 1-2 years               | lung    | Y         | N         | 0.8431373 | 1.268973  | 10.546201      | 1 MS2b2.1      | UroB           | I       | Bladder | Ca/BLCA |
| SAM19fc8c63b3bd  | PD | SD/PD | IC2 | IC2+ | TC2+ | excluded |    |    | 5  | M     | WHITE | Y            | 0 PREVIOUS   | Liver                   | (less than) 1bladder    | Y       | Y         | 0.4313725 | 0.6316679 | 9.889117  | 1 MS2b2.2      | Basal/SCC-III  |                | Bladder | Ca/BLCA |         |
| SAM6083aac8db99  | PR | CR/PR | IC1 | IC1  | TC0  | inflamed |    |    | 14 | M     | WHITE | N            | 0 PREVIOUS   | Visceral                | (less than) 1bladder    | Y       | Y         | NA        | 1.8495361 | 20.632444 |                | 0 MS2a2        | GenomicalIII   |         | Bladder | Ca/BLCA |
| SAM7ec2b6e4d46b3 | NE | NA    | IC0 | IC0  | TC0  | excluded |    |    | 36 | M     | WHITE | Y            | 1 PREVIOUS   | Visceral                | 1-2 years               | kidney  | Y         | Y         | 6.8039216 | 1.4332449 | 1.7084189      | 1 MS1b         | UroA           | I       | Bladder | Ca/BLCA |
| SAMa90d73f8d891  | PD | SD/PD | IC0 | IC0  | TC0  | NA       |    |    | 12 | M     | WHITE | N            | 0 PREVIOUS   | Visceral                | (less than) 1other      | Y       | N         | 0.7254902 | 0.8486794 | 1.0184805 | 1 MS2b2.2      | Basal/SCC-III  |                | Bladder | Ca/BLCA |         |
| SAMaf272833538   | NE | NA    | IC2 | IC2+ | TC0  | excluded |    |    | 5  | M     | WHITE | Y            | 1 NEVER      | Liver                   | (less than) 1kidney     | Y       | Y         | 1.2745098 | 1.308997  | 2.1355236 | 1 MS2a2        | GenomicalII    |                | Bladder | Ca/BLCA |         |
| SAM415f36ad349c  | PD | SD/PD | IC1 | IC1  | TC0  | excluded | NA |    | M  | WHITE | N     | 0 PREVIOUSLN | Only         | 1-2 years               | bladder                 | Y       | N         | 0.4313725 | 1.0984592 | 17.971253 | 1 MS2b2.2      | Basal/SCC-IV   |                | Bladder | Ca/BLCA |         |
| SAM7c67b05aa109  | SD | SD/PD | IC0 | IC0  | TC1  | NA       |    |    | 5  | F     | WHITE | N            | 0 NEVER      | Visceral                | 1-2 years               | bladder | Y         | Y         | 0.5294118 | 1.1752527 | 8.2464066      | 1 MS1b         | UroA           | I       | Bladder | Ca/BLCA |
| SAMad83c9c53537  | PD | SD/PD | IC1 | IC1  | TC0  | NA       |    |    | 6  | M     | WHITE | N            | 0 PREVIOUS   | Visceral                | 1-2 years               | kidney  | Y         | Y         | 0.745098  | 1.296952  | 14.98152       | 0 MS1a         | UroA           | I       | Bladder | Ca/BLCA |
| SAM3e8baff50d7a  | SD | SD/PD | IC0 | IC0  | TC0  | desert   |    |    | 11 | M     | WHITE | Y            | 0 NEVER      | Liver                   | 1-2 years               | kidney  | Y         | N         | 1.2156863 | 1.6954341 | 6.9650924      | 1 MS2a1        | GenomicalIII   |         | Bladder | Ca/BLCA |
| SAM3ec5dc89840   | PD | SD/PD | IC0 | IC0  | TC0  | desert   | NA |    | M  | WHITE | Y     | 0 CURRENT    | Visceral     | 1-2 years               | bladder                 | Y       | N         | NA        | 0.9321791 | 8.7063655 |                | 1 MS2b2.1      | UroB           | I       | Bladder | Ca/BLCA |
| SAM8a1b0e02ee42  | CR | CR/PR | IC0 | IC0  | TC0  | desert   |    |    | 14 | M     | ASIAN | N            | 0 NEVER      | LN Only                 | 1-2 years               | bladder | Y         | Y         | 0.8431373 | 1.7968415 | 20.566735      | 0 MS2a1        | GenomicalIII   |         | Bladder | Ca/BLCA |
| SAMd7457ec3a863  | CR | CR/PR | IC2 | IC2+ | TC0  | inflamed |    |    | 24 | M     | WHITE | N            | 1 PREVIOUS   | NA                      | (less than) 1bladder    | Y       | NA        | NA        | 1.1288941 | 20.271047 |                | 0 MS2b2.2      | Basal/SCC-IV   |         | Bladder | Ca/BLCA |
| SAMeb29625f76a5  | PD | SD/PD | IC1 | IC1  | TC0  | excluded |    |    | 2  | M     | WHITE | N            | 1 PREVIOUS   | Visceral                | 1-2 years               | kidney  | Y         | Y         | 0.0588235 | 1.3360582 | 3.1211499      | 1 MS1b         | UroA           | I       | Bladder | Ca/BLCA |
| SAM563d6233dfa2  | PD | SD/PD | IC0 | IC0  | TC0  | NA       | NA |    | M  | WHITE | N     | 1 PREVIOUS   | Liver        | (less than) 1bladder    | Y                       | N       | 0.6078431 | 0.9777042 | 2.1355236 | 1 MS1a    | UroA           | IV             | Bladder        | Ca/BLCA |         |         |
| SAM4581bac493af  | NE | NA    | IC2 | IC2+ | TC0  | NA       |    |    | 16 | M     | WHITE | N            | 0 NEVER      | LN Only                 | (less than) 1bladder    | Y       | Y         | 3         | 0.9869333 | 20.041068 |                | 0 MS2a2        | GenomicalIII   |         | Bladder | Ca/BLCA |
| SAMa1871f491b02  | PD | SD/PD | IC0 | IC0  | TC0  | desert   | NA |    | F  | WHITE | N     | 1 NEVER      | Liver        | more than 2bladder      | Y                       | Y       | 3.3333333 | 1.6295938 | 1.7412731 | 1 MS1b    | UroA           | I              | Bladder        | Ca/BLCA |         |         |
| SAM30e07d4874f   | PD | SD/PD | IC1 | IC1  | TC0  | excluded | NA |    | M  | WHITE | N     | 1 NEVER      | Liver        | 1-2 years               | bladder                 | Y       | N         | NA        | 1.337513  | 11.663244 |                | 1 MS2b1        | Infiltrated II |         | Bladder | Ca/BLCA |
| SAM31291c256373  | NE | NA    | IC1 | IC1  | TC0  | inflamed |    |    | 32 | M     | WHITE | Y            | 1 CURRENT    | Visceral                | (less than) 1other      | Y       | N         | 3.2156863 | 1.3903369 | 11.498973 | 1 MS2b1        | Infiltrated II |                | Bladder | Ca/BLCA |         |
| SAMd135d5867fe3  | PD | SD/PD | IC2 | IC2+ | TC2+ | excluded |    |    | 3  | M     | WHITE | Y            | 1 PREVIOUS   | Visceral                | 1-2 years               | bladder | Y         | Y         | 0.6078431 | 1.0308211 | 3.613963       | 1 MS2b2.2      | Basal/SCC-IV   |         | Bladder | Ca/BLCA |
| SAM9e11ec0bea80  | SD | SD/PD | IC2 | IC2+ | TC2+ | inflamed |    |    | 10 | M     | WHITE | N            | 1 PREVIOUS   | Visceral                | more than 2bladder      | Y       | N         | NA        | 1.3953676 | 15.408624 |                | 1 MS2b2.2      | Basal/SCC-IV   |         | Bladder | Ca/BLCA |
| SAM065890737112  | CR | CR/PR | IC2 | IC2+ | TC0  | inflamed |    |    | 8  | M     | WHITE | Y            | 0 PREVIOUSLN | Only                    | (less than) 1bladder    | Y       | Y         | NA        | 1.4387378 | 20.073922 |                | 0 MS1b         | UroA           | I       | Bladder | Ca/BLCA |
| SAMB470cb8f04bc  | CR | CR/PR | IC2 | IC2+ | TC0  | excluded |    |    | 35 | M     | WHITE | N            | 0 NEVER      | LN Only                 | more than 2bladder      | Y       | Y         | NA        | 1.4381163 | 20.073922 |                | 0 MS1b         | UroA           | I       | Bladder | Ca/BLCA |
| SAM675a1a209c15  | PD | SD/PD | IC1 | IC1  | TC0  | desert   |    |    | 13 | M     | WHITE | N            | 0 PREVIOUS   | Liver                   | 1-2 years               | bladder | Y         | N         | 1.254902  | 0.8745364 | 2.8911704      | 1 MS1a         | UroA           | I       | Bladder | Ca/BLCA |
| SAM1e9c4d1d39ac  | PD | SD/PD |     |      |      |          |    |    |    |       |       |              |              |                         |                         |         |           |           |           |           |                |                |                |         |         |         |

|                  |    |       |     |      |      |          |    |      |         |   |            |          |                        |   |    |           |           |           |           |                 |     |            |      |
|------------------|----|-------|-----|------|------|----------|----|------|---------|---|------------|----------|------------------------|---|----|-----------|-----------|-----------|-----------|-----------------|-----|------------|------|
| SAM28e6031ac18b  | SD | SD/PD | IC0 | IC0  | TC0  | desert   | NA | 22 M | WHITE   | N | 1 CURRENT  | Liver    | (less than) bladder    | Y | N  | NA        | 1.364038  | 9.2320329 | 1 MS1a    | UroA            | I   | Bladder Ca | BLCA |
| SAM486389d0d768  | PD | SD/PD | IC0 | IC0  | TC0  | desert   | NA | M    | WHITE   | N | 1 PREVIOUS | Visceral | (less than) bladder    | Y | N  | 1.4117647 | 0.7898021 | 2.201232  | 1 MS1b    | UroA            | I   | Bladder Ca | BLCA |
| SAM63b2189c36d7  | PD | SD/PD | IC0 | IC0  | TC0  | desert   | NA | 14 M | WHITE   | N | 1 CURRENT  | Liver    | more than bladder      | Y | Y  | 0.9803922 | 1.2014053 | 3.9753593 | 1 MS1b    | UroA            | I   | Bladder Ca | BLCA |
| SAM18bc5b395318  | PD | SD/PD | IC2 | IC2+ | TC1  | excluded | NA | 5 M  | WHITE   | N | 1 PREVIOUS | Liver    | (less than) bladder    | Y | Y  | 0.4705882 | 0.9653046 | 9.0020534 | 1 MS2a1   | GenomicalIV     |     | Bladder Ca | BLCA |
| SAM0d855cf6f4c6  | PD | SD/PD | IC1 | IC1  | TC1  | desert   | NA | 4 F  | WHITE   | N | 1 CURRENT  | Visceral | (less than) bladder    | Y | Y  | 0.1372549 | 1.1330218 | 2.8583162 | 1 MS2b2.1 | Basal/SCC-IV    |     | Bladder Ca | BLCA |
| SAM6c6c10abddb0  | PD | SD/PD | IC2 | IC2+ | TC0  | inflamed | NA | 3 M  | WHITE   | N | 1 NEVER    | LN Only  | (less than) bladder    | Y | Y  | 0.9607843 | 0.9335443 | 5.9466119 | 1 MS2b2.2 | Basal/SCC-III   |     | Bladder Ca | BLCA |
| SAMdee1011782cd  | PD | SD/PD | IC1 | IC1  | TC0  | NA       | NA | M    | WHITE   | N | 1 NEVER    | Visceral | (less than) lymph node | Y | Y  | NA        | 0.88244   | 3.9096509 | 1 MS2b1   | Infiltrated I   |     | Bladder Ca | BLCA |
| SAMe947577504b   | SD | SD/PD | IC1 | IC1  | TC0  | excluded | NA | M    | WHITE   | N | 0 NEVER    | Liver    | 1-2 years bladder      | Y | Y  | NA        | 0.7214688 | 18.661191 | 0 MS2b1   | Infiltrated IV  |     | Bladder Ca | BLCA |
| SAMa535fcd18a0   | PR | CR/PR | IC0 | IC0  | TC0  | NA       | NA | 19 M | WHITE   | N | 1 PREVIOUS | NA       | 1-2 years bladder      | Y | Y  | 0.8823529 | 0.8992241 | 17.281314 | 0 MS1b    | UroA            | I   | Bladder Ca | BLCA |
| SAM7746b76437e6  | NE | NA    | IC0 | IC0  | TC0  | desert   | NA | 5 M  | WHITE   | N | 1 PREVIOUS | Liver    | 1-2 years bladder      | Y | Y  | 0.3921569 | 1.6659322 | 2.825462  | 1 MS1b    | UroA            | I   | Bladder Ca | BLCA |
| SAM548551ef782c  | PR | CR/PR | IC0 | IC0  | TC0  | desert   | NA | 11 M | WHITE   | N | 1 NEVER    | Liver    | 1-2 years bladder      | Y | Y  | 1.8235294 | 1.9540179 | 17.281314 | 0 MS2a1   | GenomicalIV     |     | Bladder Ca | BLCA |
| SAM203dcf14f927  | CR | CR/PR | IC1 | IC1  | TC1  | inflamed | NA | 13 M | WHITE   | N | 1 CURRENT  | LN Only  | more than bladder      | Y | Y  | 2.3921569 | 1.4474569 | 19.351129 | 0 MS2a2   | GenomicalIII    |     | Bladder Ca | BLCA |
| SAMe41b1c773582  | PD | SD/PD | IC1 | IC1  | TC0  | excluded | NA | 6 M  | WHITE   | N | 1 NEVER    | NA       | (less than) bladder    | Y | Y  | 0.4705882 | 1.4048011 | 0.8542094 | 1 MS2b2.2 | Basal/SCC-III   |     | Bladder Ca | BLCA |
| SAM978a587b207c  | PD | SD/PD | IC0 | IC1  | TC2+ | excluded | NA | M    | WHITE   | N | 0 CURRENT  | LN Only  | (less than) bladder    | Y | N  | 1.9215686 | 1.0428693 | 2.1026694 | 1 MS2a2   | GenomicalIII    |     | Bladder Ca | BLCA |
| SAM5234688806a7  | PD | SD/PD | IC0 | IC0  | TC0  | desert   | NA | 13 M | WHITE   | N | 1 PREVIOUS | Liver    | more than kidney       | Y | Y  | 0.3137255 | 0.3565374 | 5.8809035 | 1 MS1b    | UroA            | I   | Bladder Ca | BLCA |
| SAM2c9586161cc6  | PD | SD/PD | IC1 | IC1  | TC0  | desert   | NA | 9 M  | WHITE   | N | 0 NEVER    | Visceral | 1-2 years bladder      | Y | Y  | 0.4313725 | 1.4851796 | 11.268994 | 1 MS1b    | UroA            | I   | Bladder Ca | BLCA |
| SAM76a431ba6c2b  | PD | SD/PD | IC1 | IC1  | TC0  | inflamed | NA | 6 M  | WHITE   | N | 0 NEVER    | Visceral | (less than) kidney     | N | NA | 0.2156863 | 0.8047688 | 14.12731  | 1 MS2b1   | Infiltrated III |     | Bladder Ca | BLCA |
| SAM7a9093b97e9   | NE | NA    | IC0 | IC0  | TC0  | desert   | NA | 1 M  | WHITE   | N | 1 NEVER    | NA       | 1-2 years kidney       | Y | Y  | 0.2156863 | 0.8219233 | 1.8069815 | 0 MS2b1   | Infiltrated II  |     | Bladder Ca | BLCA |
| SAM8f2275c36e8c  | SD | SD/PD | IC1 | IC1  | TC0  | desert   | NA | 5 M  | WHITE   | N | 0 NEVER    | Visceral | 1-2 years bladder      | Y | Y  | NA        | 1.631054  | 20.731006 | 0 MS1b    | UroA            | I   | Bladder Ca | BLCA |
| SAMab8052a03398  | SD | SD/PD | IC2 | IC2+ | TC0  | inflamed | NA | M    | WHITE   | N | 1 NEVER    | LN Only  | (less than) lymph node | Y | N  | 0.0392157 | 0.767621  | 13.305955 | 1 MS2b1   | Infiltrated III |     | Bladder Ca | BLCA |
| SAMd3b4d7996035  | CR | CR/PR | IC2 | IC2+ | TC0  | excluded | NA | 7 M  | WHITE   | N | 0 PREVIOUS | LN Only  | more than lymph node   | Y | Y  | 1.5686275 | 1.335883  | 20.829569 | 0 MS2a2   | GenomicalIII    |     | Bladder Ca | BLCA |
| SAMd4c3e9b26b2   | NE | NA    | IC0 | IC0  | TC0  | excluded | NA | F    | WHITE   | Y | 1 PREVIOUS | NA       | 1-2 years bladder      | Y | Y  | NA        | 1.3400734 | 1.9383984 | 1 MS2b1   | Infiltrated II  |     | Bladder Ca | BLCA |
| SAM753d4bb52dbe  | SD | SD/PD | IC1 | IC1  | TC0  | excluded | NA | 7 M  | WHITE   | N | 1 CURRENT  | Visceral | (less than) ureter     | Y | Y  | NA        | 1.5230801 | 11.367556 | 1 MS2b1   | Infiltrated I   |     | Bladder Ca | BLCA |
| SAMd3601288319e  | CR | CR/PR | IC2 | IC2+ | TC0  | excluded | NA | 14 M | OTHER   | N | 0 PREVIOUS | LN Only  | 1-2 years other        | Y | N  | 0.7843137 | 0.9695397 | 23.129363 | 0 MS2a1   | GenomicalIII    |     | Bladder Ca | BLCA |
| SAM59f3928645d   | SD | SD/PD | IC2 | IC2+ | TC0  | excluded | NA | 14 M | OTHER   | N | 0 PREVIOUS | LN Only  | more than bladder      | Y | N  | NA        | 1.0260164 | 17.774127 | 1 MS2b1   | Infiltrated II  |     | Bladder Ca | BLCA |
| SAM26104d5ad89   | SD | SD/PD | IC0 | IC0  | TC0  | excluded | NA | 1 M  | ASIAN   | Y | 1 PREVIOUS | Visceral | (less than) bladder    | N | NA | 0.2745098 | 0.958124  | 5.3880903 | 1 MS1a    | UroA            | III | Bladder Ca | BLCA |
| SAMb1a134b5a060  | PD | SD/PD | IC2 | IC2+ | TC0  | inflamed | NA | 5 M  | WHITE   | N | 0 NEVER    | Visceral | (less than) bladder    | Y | N  | 0.9019608 | 1.0230179 | 12.845996 | 1 MS2b2.2 | Basal/SCC-III   |     | Bladder Ca | BLCA |
| SAM18a4dabbe557  | PD | SD/PD | IC2 | IC2+ | TC2+ | excluded | NA | 18 M | WHITE   | N | 1 PREVIOUS | Visceral | 1-2 years bladder      | Y | Y  | 2.0392157 | 1.5142254 | 16.459959 | 1 MS2a2   | GenomicalIII    |     | Bladder Ca | BLCA |
| SAM7baec7e0bc62  | PR | CR/PR | IC2 | IC2+ | TC2+ | inflamed | NA | M    | WHITE   | N | 1 PREVIOUS | NA       | (less than) bladder    | Y | Y  | 5.9215686 | 1.6024372 | 22.537988 | 0 MS2b2.2 | Basal/SCC-IV    |     | Bladder Ca | BLCA |
| SAMfed609955db9  | PD | SD/PD | IC2 | IC2+ | TC2+ | desert   | NA | 7 F  | WHITE   | N | 0 NEVER    | Visceral | (less than) bladder    | Y | Y  | 0.3529412 | 1.0412919 | 20.566735 | 0 MS1b    | UroA            | I   | Bladder Ca | BLCA |
| SAMb8070b7937e7  | SD | SD/PD | IC1 | IC1  | TC0  | desert   | NA | 5 M  | WHITE   | Y | 0 PREVIOUS | Liver    | (less than) bladder    | Y | Y  | 0.3333333 | 0.9213601 | 21.026694 | 1 MS1b    | UroA            | I   | Bladder Ca | BLCA |
| SAM2f2aee14436f7 | PD | SD/PD | IC1 | IC1  | TC0  | desert   | NA | 7 F  | WHITE   | N | 0 NEVER    | Visceral | 1-2 years bladder      | Y | Y  | 0.8039216 | 1.4567294 | 10.349076 | 1 MS1b    | UroA            | III | Bladder Ca | BLCA |
| SAM2bba8cb35e48  | PD | SD/PD | IC0 | IC0  | TC0  | excluded | NA | 11 M | WHITE   | N | 1 PREVIOUS | Liver    | more than bladder      | Y | Y  | 1.2941176 | 0.800619  | 10.480493 | 1 MS2b1   | Infiltrated II  |     | Bladder Ca | BLCA |
| SAM5c0ee0a8c05b4 | NE | NA    | IC1 | IC1  | TC1  | excluded | NA | 7 M  | WHITE   | N | 1 PREVIOUS | Liver    | more than bladder      | Y | Y  | 1.3725459 | 1.5152008 | 16.755647 | 1 MS2a1   | GenomicalIII    |     | Bladder Ca | BLCA |
| SAM5c139c5c1c4f  | PD | SD/PD | IC2 | IC2+ | TC0  | excluded | NA | 5 M  | WHITE   | N | 1 PREVIOUS | Liver    | more than bladder      | Y | Y  | NA        | 0.6551373 | 7.2279261 | 1 MS2b2.1 | UroB            | III | Bladder Ca | BLCA |
| SAMc1251c7bfce2  | PR | CR/PR | IC2 | IC2+ | TC0  | excluded | NA | 5 M  | WHITE   | N | 0 PREVIOUS | Visceral | (less than) bladder    | Y | Y  | 1.0980392 | 1.6358917 | 21.61807  | 0 MS2a2   | GenomicalIV     |     | Bladder Ca | BLCA |
| SAM6780ed436b55  | PD | SD/PD | IC2 | IC2+ | TC0  | inflamed | NA | 14 F | WHITE   | N | 1 PREVIOUS | Visceral | more than bladder      | Y | Y  | 2.5490196 | 1.1277506 | 6.2422998 | 1 MS2b2.2 | Basal/SCC-III   |     | Bladder Ca | BLCA |
| SAM85f0a3ac1c45  | PD | SD/PD | IC2 | IC2+ | TC0  | excluded | NA | 8 M  | WHITE   | N | 1 CURRENT  | Visceral | 1-2 years lung         | Y | Y  | 0.2745098 | 1.1247386 | 5.8480493 | 1 MS1b    | UroA            | III | Bladder Ca | BLCA |
| SAM9d2494119c05  | PD | SD/PD | IC0 | IC0  | TC0  | NA       | NA | M    | WHITE   | N | 1 NEVER    | Liver    | (less than) liver      | Y | N  | NA        | 0.9584474 | 1.4455852 | 1 MS1b    | UroA            | I   | Bladder Ca | BLCA |
| SAM9410b866974d  | SD | SD/PD | IC0 | IC0  | TC0  | NA       | NA | M    | WHITE   | N | 1 NEVER    | LN Only  | 1-2 years bladder      | Y | N  | NA        | 1.4674834 | 6.7351129 | 1 MS2b1   | Infiltrated IV  |     | Bladder Ca | BLCA |
| SAM54989c86255c  | PD | SD/PD | IC1 | IC1  | TC0  | desert   | NA | 13 F | UNKNOWN | N | 1 PREVIOUS | Liver    | (less than) bladder    | Y | N  | 1.4117647 | 0.8128341 | 3.449692  | 1 MS2a2   | GenomicalIII    |     | Bladder Ca | BLCA |
| SAM27299aed7681  | PR | CR/PR | IC1 | IC1  | TC0  | excluded | NA | 8 F  | UNKNOWN | Y | 0 NEVER    | NA       | 1-2 years bladder      | Y | Y  | 0.745098  | 1.8643605 | 18.858316 | 0 MS1b    | UroA            | I   | Bladder Ca | BLCA |
| SAM49448750e294  | PD | SD/PD | IC1 | IC1  | TC0  | excluded | NA | 0 M  | UNKNOWN | N | 0 PREVIOUS | Visceral | 1-2 years bladder      | Y | Y  | 0.6078431 | 1.1049738 | 9.8562628 | 1 MS2b1   | Infiltrated II  |     | Bladder Ca | BLCA |
| SAMd43f8933066b  | PR | CR/PR | IC1 | IC1  | TC0  | inflamed | NA | 15 M | UNKNOWN | N | 0 PREVIOUS | Visceral | more than bladder      | Y | Y  | 1.8823529 | 0.9034526 | 20.008214 | 0 MS2b1   | Infiltrated II  |     | Bladder Ca | BLCA |
| SAM7aa01fe49a80  | PD | SD/PD | IC1 | IC1  | TC0  | excluded | NA | M    | WHITE   | N | 1 PREVIOUS | Liver    | more than bladder      | N | NA | 1.0392157 | 1.063461  | 2.1355236 | 1 MS2b1   | Infiltrated II  |     | Bladder Ca | BLCA |
| SAM0257fbbbd388  | SD | SD/PD | IC1 | IC1  | TC0  | excluded | NA | 18 M | WHITE   | N | 1 PREVIOUS | Visceral | more than bladder      | Y | Y  | 4.6862745 | 1.5676777 | 15.638604 | 1 MS2a1   | GenomicalIII    |     | Bladder Ca | BLCA |
| SAMe919aeb7fdd   | PR | CR/PR | IC2 | IC2+ | TC0  | inflamed | NA | 3 M  | WHITE   | N | 0 NEVER    | LN Only  | 1-2 years bladder      | Y | Y  | 0.6078431 | 0.6171654 | 20.731006 | 0 MS2b1   | Infiltrated IV  |     | Bladder Ca | BLCA |
| SAMa321770ac31c  | PD | SD/PD | IC2 | IC2+ | TC0  | excluded | NA | 8 M  | WHITE   | N | 0 PREVIOUS | Visceral | (less than) lymph node | Y | N  | 1.4117647 | 1.388588  | 7.063655  | 0 MS2b2.2 | Basal/SCC-II    |     | Bladder Ca | BLCA |
| SAM3894ac3956a5  | PD | SD/PD | IC1 | IC1  | TC0  | excluded | NA | 5 M  | WHITE   | N | 0 PREVIOUS | Visceral | (less than) bladder    | Y | Y  | NA        | 1.9056578 | 2.1026694 | 0 MS1b    | UroA            | I   | Bladder Ca | BLCA |
| SAM3779c9799db6b | NE | NA    | IC1 | IC1  | TC0  | excluded | NA | M    | WHITE   | N | 0 CURRENT  | Visceral | more than bladder      | Y | Y  | NA        | 1.4222534 | 1.3141684 | 1 MS1a    | UroA            | I   | Bladder Ca | BLCA |
| SAM1e0ecfb3eb63  | PD | SD/PD | IC2 | IC2+ | TC0  | excluded | NA | F    | WHITE   | N | 0 PREVIOUS | Liver    | (less than) bladder    | Y | NA | NA        | 1.1657915 | 5.8480493 | 1 MS2b2.2 | Basal/SCC-III   |     | Bladder Ca | BLCA |
| SAMb91f27e7f9b   | NE | NA    | IC2 | IC2+ | TC0  | excluded | NA | 3 M  | WHITE   | N | 0 PREVIOUS | Liver    | 1-2 years kidney       | Y | Y  | NA        | 0.7785956 | 0.5913758 | 1 MS2b1   | Infiltrated I   |     | Bladder Ca | BLCA |
| SAMbcb07ba81cee  | PD | SD/PD | IC2 | IC2+ | TC0  | excluded | NA | M    | WHITE   | N | 0 PREVIOUS | Liver    | more than bladder      | Y | Y  | NA        | 0.3524916 | 5.2597741 | 1 MS2b2.2 | Basal/SCC-III   |     | Bladder Ca | BLCA |
| SAM9aa6a095a9d6  | PD | SD/PD | IC1 | IC1  | TC0  | excluded | NA | 5 M  | WHITE   | Y | 0 PREVIOUS | NA       | more than kidney       | Y | Y  | 0.6470588 | 0.8822393 | 8.8377823 | 1 MS2b2.1 | UroB            | I   | Bladder Ca | BLCA |
| SAM957378b4907f  | PD | SD/PD | IC0 | IC0  | TC0  | excluded | NA | M    | WHITE   | N | 0 PREVIOUS | Liver    | 1-2 years ureter       | Y | N  | 0.1960784 | 0.8701417 | 2.2340862 | 1 MS2b1   | Infiltrated II  |     | Bladder Ca | BLCA |
| SAMf82bbdc267c8  | PD | SD/PD | IC0 | IC0  | TC0  | desert   | NA | 7 M  | WHITE   | N | 0 CURRENT  | Visceral | 1-2 years kidney       | Y | Y  | 0.5294118 | 1.1718074 | 3.1211499 | 1 MS1b    | UroA            | I   | Bladder Ca | BLCA |
| SAM2624229effe8  | PD | SD/PD | IC0 | IC0  | TC0  | excluded | NA | 6 M  | WHITE   | N | 1 PREVIOUS | Visceral | more than bladder      | Y | Y  | 0.4313725 | 0.5678449 | 2.5626283 | 1 MS2b1   | Infiltrated I   |     | Bladder Ca | BLCA |
| SAMd42492ba31bb  | PD | SD/PD | IC2 | IC2+ | TC2+ | desert   | NA | 3 F  | WHITE   | N | 0 NEVER    | LN Only  | (less than) lymph node | Y | N  | 0.4901961 | 0.8248836 | 7.8521561 | 1 MS2b2.2 | Basal/SCC-III   |     | Bladder Ca | BLCA |
| SAM67064e105b5   | CR | CR/PR | IC2 | IC2+ | TC0  | excluded | NA | 15 F | WHITE   | N | 0 NEVER    | LN Only  | (less than) bladder    | Y | Y  | 2.6862745 | 1.1488853 | 22.078029 | 0 MS2b2.2 | Basal/SCC-I     |     | Bladder Ca | BLCA |
| SAM91c47b054fbb  | PR | CR/PR | IC2 | IC2+ | TC0  | inflamed | NA | 49 M | WHITE   | Y | 0 PREVIOUS | Visceral | (less than) bladder    | Y | N  | 2.7058824 | 1.10269   | 17.01848  | 1 MS2a1   | GenomicalIII    |     | Bladder Ca | BLCA |
| SAM491c341d5a82  | NE | NA    | IC1 | IC1  | TC0  | desert   | NA | 13 F | WHITE   | N | 0 NEVER    | Visceral | more than bladder      | Y | Y  | NA        | 0.978218  | 1.8726899 | 1 MS2a1   | GenomicalIII    |     | Bladder Ca | BLCA |
| SAM5fc7a81a39ad  | PD | SD/PD | IC2 | IC2+ | TC0  | inflamed | NA | 21 M | WHITE   | Y |            |          |                        |   |    |           |           |           |           |                 |     |            |      |



|                  |    |         |     |      |      |          |      |           |   |                     |                         |   |    |           |           |           |           |               |     |            |      |
|------------------|----|---------|-----|------|------|----------|------|-----------|---|---------------------|-------------------------|---|----|-----------|-----------|-----------|-----------|---------------|-----|------------|------|
| SAM8e469834acc1  | PD | SD/PD   | IC1 | IC1  | TC0  | excluded | 6 M  | WHITE     | N | 1 NEVER Liver       | more than 2bladder      | Y | Y  | NA        | 0.9785567 | 3.7125257 | 1 MS1a    | UroA          | I   | Bladder Ca | BLCA |
| SAM8e43e9ca3f07  | NE | NA      | IC1 | IC1  | TC0  | excluded | 4 F  | WHITE     | N | 0 PREVIOUS Liver    | (less than) 1bladder    | Y | Y  | NA        | 1.3920426 | 0.4928131 | 1 MS2a1   | GenomicalIII  |     | Bladder Ca | BLCA |
| SAM12502d970c10  | SD | SD/PD   | IC2 | IC2+ | TC0  | inflamed | 10 M | WHITE     | N | 0 PREVIOUS Visceral | more than 2kidney       | Y | Y  | 1.0784314 | 0.7126916 | 7.3921971 | 1 MS1b    | UroA          | I   | Bladder Ca | BLCA |
| SAM9681450bbe90  | NE | NA      | IC2 | IC2+ | TC0  | inflamed | 21 M | WHITE     | N | 1 PREVIOUS Visceral | more than 2bladder      | Y | Y  | NA        | 1.1828728 | 4.9609856 | 1 MS2b1   | Infiltrated   | III | Bladder Ca | BLCA |
| SAM7d7c54623618  | PR | CR/PR   | IC0 | IC0  | TC0  | excluded | 8 M  | WHITE     | N | 0 CURRENT Liver     | (less than) 1bladder    | Y | N  | 2.0980392 | 1.1321011 | 21.223819 | 0 MS2a1   | GenomicalIII  |     | Bladder Ca | BLCA |
| SAM181b638828428 | PD | SD/PD   | IC2 | IC2+ | TC2+ | excluded | NA   | WHITE     | N | 1 CURRENT Liver     | (less than) 1kidney     | Y | Y  | 0.2156863 | 0.8850555 | 10.874743 | 1 MS2b1   | Infiltrated   | IV  | Bladder Ca | BLCA |
| SAM1bdfbf97e446  | SD | SD/PD   | IC1 | IC1  | TC2+ | excluded | 6 F  | WHITE     | N | 1 CURRENT Visceral  | (less than) 1bladder    | Y | Y  | 1.4509804 | 1.2931396 | 6.7022587 | 1 MS2b2.2 | Basal/SCC-IV  |     | Bladder Ca | BLCA |
| SAM3b15b4e6311d  | CR | CR/PR   | IC2 | IC2+ | TC2+ | inflamed | 44 M | WHITE     | N | 1 NEVER Visceral    | more than 2bladder      | Y | Y  | 5.8235294 | 1.598227  | 21.453799 | 0 MS2b2.2 | Basal/SCC-III |     | Bladder Ca | BLCA |
| SAM00b9e5c52da9  | NE | NA      | IC1 | IC1  | TC0  | excluded | NA   | WHITE     | Y | 1 PREVIOUS Visceral | 1-2 years bladder       | Y | Y  | NA        | 1.2170723 | 1.9055441 | 1 MS2b2.1 | UroB          | III | Bladder Ca | BLCA |
| SAM59b825252c0d  | NE | NA      | IC1 | IC1  | TC0  | NA       | 15 M | WHITE     | N | 1 NEVER LN Only     | more than 2lymph node   | Y | N  | NA        | 2.55122   | 0.5256674 | 1 MS2b2.2 | Basal/SCC-III |     | Bladder Ca | BLCA |
| SAM1c8b086175ca  | PD | SD/PD   | IC0 | IC0  | TC0  | excluded | 7 M  | WHITE     | N | 0 PREVIOUS Visceral | more than 2bladder      | Y | Y  | 0.5490196 | 0.6377364 | 20.76386  | 1 MS2b1   | Infiltrated   | I   | Bladder Ca | BLCA |
| SAMeaa477a5384b  | CR | CR/PR   | IC2 | IC2+ | TC0  | inflamed | 14 M | WHITE     | N | 0 PREVIOUSNA        | more than 2bladder      | Y | Y  | 2.7647059 | 1.1199141 | 21.585216 | 0 MS2b2.1 | UroB          | I   | Bladder Ca | BLCA |
| SAM1dda30f1c5be  | PD | SD/PD   | IC1 | IC1  | TC0  | desert   | 20 M | WHITE     | N | 0 PREVIOUSNA        | 1-2 years bladder       | Y | Y  | 4.0196078 | 1.37136   | 21.256674 | 0 MS2b1   | Infiltrated   | II  | Bladder Ca | BLCA |
| SAM9eebdef2858a  | NE | NA      | IC1 | IC1  | TC0  | excluded | NA   | WHITE     | N | 1 NEVER Liver       | more than 2bladder      | Y | Y  | NA        | 0.6207374 | 0.8213552 | 1 MS2a1   | GenomicalIV   |     | Bladder Ca | BLCA |
| SAM9daccacf18db  | PD | SD/PD   | IC0 | IC0  | TC0  | desert   | NA   | WHITE     | N | 0 CURRENT Visceral  | (less than) 1kidney     | Y | Y  | NA        | 0.5972494 | 16.459959 | 0 MS2b2.2 | Basal/SCC-III |     | Bladder Ca | BLCA |
| SAM2eb07ded07f   | PR | CR/PR   | IC2 | IC2+ | TC0  | inflamed | 13 M | WHITE     | Y | 0 PREVIOUS Visceral | 1-2 years bladder       | Y | Y  | 1.1372549 | 0.30554   | 20.501027 | 0 MS2b1   | Infiltrated   | II  | Bladder Ca | BLCA |
| SAM2551030d79    | CR | CR/PR   | IC0 | IC0  | TC0  | desert   | NA   | WHITE     | N | 0 PREVIOUS Visceral | (less than) 1other      | Y | N  | 1.8235294 | 1.785162  | 20.698152 | 0 MS2b2.1 | Basal/SCC-III |     | Bladder Ca | BLCA |
| SAMbda79b955628  | SD | SD/PD   | IC2 | IC2+ | TC0  | inflamed | 20 F | WHITE     | N | 1 PREVIOUSNA        | 1-2 years bladder       | Y | Y  | 1.254902  | 0.3732798 | 20.632444 | 0 MS2a2   | GenomicalIII  |     | Bladder Ca | BLCA |
| SAM9b94d48b0b02e | NE | NA      | IC1 | IC1  | TC0  | inflamed | 5 M  | WHITE     | Y | 1 PREVIOUS Liver    | more than 2bladder      | Y | Y  | 2.1176471 | 1.5839987 | 2.8911704 | 1 MS2a1   | GenomicalIII  |     | Bladder Ca | BLCA |
| SAMff41c4e8c08f  | NE | NA      | IC0 | IC0  | TC0  | excluded | 14 M | WHITE     | N | 0 PREVIOUS Visceral | (less than) 1bladder    | Y | Y  | NA        | 1.8724543 | 2.4640657 | 1 MS1a    | UroA          | I   | Bladder Ca | BLCA |
| SAMe97f35a29d1b  | NE | NA      | IC0 | IC0  | TC0  | desert   | 13 M | WHITE     | N | 1 PREVIOUS Visceral | (less than) 1bladder    | Y | Y  | NA        | 0.826934  | 0.8213552 | 0 MS1a    | UroA          | II  | Bladder Ca | BLCA |
| SAM187e056d6a2a  | PD | SD/PD   | IC0 | IC0  | TC0  | NA       | NA   | WHITE     | N | 0 CURRENT Visceral  | (less than) 1lung       | Y | N  | NA        | 0.8381923 | 2.2997947 | 1 MS1b    | UroA          | I   | Bladder Ca | BLCA |
| SAMb8c8d3a7b54e  | PD | SD/PD   | IC0 | IC0  | TC0  | desert   | 7 F  | WHITE     | Y | 1 PREVIOUS Visceral | (less than) 1bladder    | N | NA | 0.745098  | 1.0178079 | 14.75154  | 1 MS2a1   | GenomicalIII  |     | Bladder Ca | BLCA |
| SAM7b4000744a4   | PR | CR/PR   | IC0 | IC0  | TC0  | NA       | 12 F | WHITE     | N | 1 NEVER Visceral    | (less than) 1ureter     | N | NA | NA        | 0.9789806 | 21.650924 | 0 MS2a1   | GenomicalIV   |     | Bladder Ca | BLCA |
| SAM568ce160ab49  | SD | SD/PD   | IC0 | IC0  | TC0  | NA       | NA   | WHITE     | Y | 0 PREVIOUS Visceral | 1-2 years bladder       | Y | N  | NA        | 0.3189927 | 12.845996 | 1 MS2b1   | Infiltrated   | III | Bladder Ca | BLCA |
| SAM14938611a2d3  | PR | CR/PR   | IC1 | IC1  | TC0  | desert   | 38 M | WHITE     | Y | 2 PREVIOUS LN Only  | 1-2 years bladder       | N | NA | 6.6862745 | 1.15817   | 21.420945 | 0 MS2a1   | GenomicalIII  |     | Bladder Ca | BLCA |
| SAM1a87df750b9d  | SD | SD/PD   | IC1 | IC1  | TC0  | excluded | 8 M  | WHITE     | N | 2 PREVIOUS Visceral | (less than) 1bladder    | N | NA | 1.1764706 | 0.9242222 | 5.3880903 | 1 MS2b2.1 | Basal/SCC-III |     | Bladder Ca | BLCA |
| SAMea02629a977   | PD | SD/PD   | IC0 | IC0  | TC0  | NA       | NA   | WHITE     | N | 0 PREVIOUS Liver    | (less than) 1kidney     | Y | N  | NA        | 0.7722862 | 3.2525667 | 1 MS1b    | UroA          | II  | Bladder Ca | BLCA |
| SAM47f646c3d9b6  | SD | SD/PD   | IC2 | IC2+ | TC0  | inflamed | 8 M  | WHITE     | N | 0 PREVIOUS LN Only  | (less than) 1bladder    | N | NA | 0.8039216 | 0.7616366 | 18.726899 | 0 MS2b1   | Infiltrated   | IV  | Bladder Ca | BLCA |
| SAM7829a341b9f3  | PD | SD/PD   | IC2 | IC2+ | TC1  | inflamed | 3 M  | WHITE     | Y | 1 PREVIOUSNA        | (less than) 1bladder    | N | NA | 0.745098  | 0.7141024 | 3.8767967 | 1 MS2b2.2 | Basal/SCC-IV  |     | Bladder Ca | BLCA |
| SAM0f956c757453  | PD | SD/PD   | IC1 | IC1  | TC0  | excluded | 32 M | WHITE     | Y | 1 PREVIOUS Visceral | (less than) 1ureter     | N | NA | 4.0980392 | 0.7302443 | 10.414784 | 1 MS2b1   | Infiltrated   | II  | Bladder Ca | BLCA |
| SAMa42c1541269   | SD | SD/PD   | IC2 | IC2+ | TC0  | inflamed | 14 M | WHITE     | N | 1 PREVIOUS Liver    | (less than) 1bladder    | N | NA | 2.1960784 | 0.795428  | 5.5195072 | 0 MS2a2   | GenomicalIII  |     | Bladder Ca | BLCA |
| SAM09e84ec0f34   | PD | SD/PD   | IC0 | IC0  | TC0  | inflamed | NA   | WHITE     | N | 1 PREVIOUS Liver    | (less than) 1NA         | Y | N  | NA        | 0.6619941 | 6.5051335 | 1 MS1b    | UroA          | I   | Bladder Ca | BLCA |
| SAM75f38a49ff524 | SD | SD/PD   | IC1 | IC1  | TC0  | inflamed | 21 F | WHITE     | N | 1 PREVIOUSNA        | (less than) 1bladder    | N | NA | 2.3921569 | 0.6578175 | 19.12115  | 0 MS2b2.1 | UroB          | III | Bladder Ca | BLCA |
| SAM95c70496ff5   | NE | NA      | IC2 | IC2+ | TC0  | inflamed | NA   | OTHER     | N | 0 NEVER Visceral    | (less than) 1lymph node | Y | N  | NA        | 0.5677525 | 0.3613963 | 1 MS2b1   | Infiltrated   | III | Bladder Ca | BLCA |
| SAM7edach3deb65  | NE | NA      | IC0 | IC0  | TC0  | desert   | NA   | WHITE     | Y | 1 PREVIOUS LN Only  | 1-2 years kidney        | N | NA | 0.6470588 | 0.571193  | 18.004107 | 0 MS2a1   | GenomicalIII  |     | Bladder Ca | BLCA |
| SAMb2e4a082541a  | PD | SD/PD   | IC1 | IC1  | TC0  | NA       | NA   | WHITE     | N | 1 NEVER Visceral    | 1-2 years bladder       | Y | N  | NA        | 0.7209244 | 4.3696099 | 1 MS2b1   | Infiltrated   | IV  | Bladder Ca | BLCA |
| SAM771445e92421  | CR | CR/PR   | IC1 | IC1  | TC0  | inflamed | NA   | WHITE     | N | 0 NEVER LN Only     | more than 2bladder      | Y | N  | 0.2156863 | 0.4901461 | 19.416838 | 0 MS2b1   | Infiltrated   | III | Bladder Ca | BLCA |
| SAM59fda9035d1d  | PD | SD/PD   | IC0 | IC0  | TC0  | NA       | NA   | WHITE     | N | 1 NEVER Visceral    | (less than) 1NA         | Y | N  | NA        | 0.4937011 | 3.7453799 | 1 MS2b1   | Infiltrated   | IV  | Bladder Ca | BLCA |
| SAM727c0e92a2a7  | PR | CR/PR   | IC2 | IC2+ | TC2+ | NA       | 1 M  | WHITE     | Y | 0 PREVIOUS LN Only  | (less than) 1lymph node | N | NA | 0.3333333 | 0.9559615 | 18.726899 | 0 MS2a2   | GenomicalIII  |     | Bladder Ca | BLCA |
| SAM6f2a102a99df  | CR | CR/PR   | IC2 | IC2+ | TC2+ | NA       | 8 F  | WHITE     | N | 1 NEVER NA          | (less than) 1NA         | N | NA | 2.0784314 | 0.7434797 | 19.285421 | 0 MS2a2   | GenomicalIII  |     | Bladder Ca | BLCA |
| SAMe56c96c51190  | PD | SD/PD   | IC1 | IC1  | TC2+ | excluded | 5 F  | WHITE     | N | 2 NEVER Liver       | (less than) 1kidney     | N | NA | 0.0980392 | 0.809542  | 9.7577002 | 1 MS2b1   | Infiltrated   | III | Bladder Ca | BLCA |
| SAM2b672f4336c7  | SD | SD/PD   | IC0 | IC0  | TC0  | desert   | 2 M  | WHITE     | N | 0 NEVER Visceral    | more than 2kidney       | N | NA | 0.1568627 | 0.5967541 | 15.310062 | 1 MS1b    | UroA          | I   | Bladder Ca | BLCA |
| SAM1ab1b28d9f2b  | PD | SD/PD   | IC1 | IC1  | TC0  | desert   | 13 F | WHITE     | N | 1 PREVIOUS Liver    | more than 2ureter       | N | NA | 0.2941176 | 0.5499406 | 2.1026694 | 1 MS2a1   | GenomicalIII  |     | Bladder Ca | BLCA |
| SAM1bcc62d8290c  | NE | NA      | IC1 | IC1  | TC0  | excluded | 10 M | WHITE     | Y | 1 PREVIOUS Visceral | (less than) 1bladder    | N | NA | 1.4901961 | 0.8625537 | 18.628337 | 0 MS2a1   | GenomicalIV   |     | Bladder Ca | BLCA |
| SAM6662f51818f7  | PD | SD/PD   | IC1 | IC1  | TC0  | inflamed | 5 M  | WHITE     | N | 0 PREVIOUS Liver    | (less than) 1bladder    | N | NA | 0.4901961 | 0.9183822 | 19.285421 | 0 MS1a    | UroA          | I   | Bladder Ca | BLCA |
| SAMe0c49eac0df5d | SD | SD/PD   | IC1 | IC1  | TC0  | excluded | 2 F  | WHITE     | N | 1 PREVIOUS Visceral | (less than) 1bladder    | N | NA | NA        | 0.9118008 | 4.1396304 | 1 MS2b2.1 | UroB          | III | Bladder Ca | BLCA |
| SAM5289cca2c4299 | NE | NA      | IC1 | IC1  | TC0  | excluded | 4 M  | WHITE     | N | 0 PREVIOUS Liver    | (less than) 1kidney     | N | NA | 0.2352941 | 0.4384215 | 1.7084189 | 1 MS2b2.2 | Basal/SCC-III |     | Bladder Ca | BLCA |
| SAM18b9351e265a  | PD | SD/PD   | IC2 | IC2+ | TC0  | inflamed | 7 M  | BLACK ORN |   | 2 PREVIOUS Liver    | (less than) 1ureter     | N | NA | 0.3921569 | 0.7938952 | 15.868583 | 1 MS2b1   | Infiltrated   | III | Bladder Ca | BLCA |
| SAM7fb7a13c096b  | PD | SD/PD   | IC0 | IC0  | TC0  | excluded | 11 M | ASIAN     | N | 2 CURRENT Liver     | (less than) 1kidney     | N | NA | 0.7647059 | 0.4837686 | 1.6755647 | 1 MS2b1   | Infiltrated   | II  | Bladder Ca | BLCA |
| SAM87a8e18eb45b  | PD | SD/PD   | IC1 | IC1  | TC0  | excluded | 14 F | WHITE     | N | 2 NEVER Visceral    | (less than) 1bladder    | N | NA | 0.3137255 | 1.0486112 | 2.7597536 | 1 MS1b    | UroA          | I   | Bladder Ca | BLCA |
| SAM1f3e93814c89  | NE | NA      | IC0 | IC0  | TC0  | excluded | 5 M  | WHITE     | N | 2 PREVIOUS Visceral | (less than) 1bladder    | N | NA | 1.1372549 | 0.6774598 | 1.4455852 | 1 MS2a2   | GenomicalIII  |     | Bladder Ca | BLCA |
| SAM5fc9ae0acd1f  | NE | NA      | IC2 | IC2+ | TC2+ | inflamed | 6 M  | WHITE     | N | 2 PREVIOUS LN Only  | (less than) 1bladder    | N | NA | 2.0196078 | 0.8817935 | 0.62423   | 1 MS2b2.2 | Basal/SCC-IV  |     | Bladder Ca | BLCA |
| SAM9725303dcec0c | PD | SD/PD   | IC1 | IC1  | TC0  | desert   | 22 M | WHITE     | Y | 1 NEVER Liver       | more than 2bladder      | N | NA | 4.4313725 | 1.3073688 | 8.9034908 | 0 MS2a1   | GenomicalIII  |     | Bladder Ca | BLCA |
| SAM6ff654a20f98  | CR | CR/PR   | IC1 | IC1  | TC0  | excluded | 6 M  | WHITE     | N | 0 PREVIOUSNA        | (less than) 1kidney     | N | NA | 1.0392157 | 0.6739146 | 18.562628 | 0 MS2b1   | Infiltrated   | I   | Bladder Ca | BLCA |
| SAM65afda25b920  | SD | SD/PD   | IC2 | IC2+ | TC2+ | excluded | 4 M  | WHITE     | Y | 2 CURRENT Visceral  | more than 2bladder      | N | NA | 0.2941176 | 0.2899377 | 8.0821355 | 1 MS2b1   | Infiltrated   | III | Bladder Ca | BLCA |
| SAMef0e3d2415fd  | SD | SD/PD   | IC2 | IC2+ | TC2+ | inflamed | 1 M  | WHITE     | N | 0 PREVIOUS Visceral | (less than) 1lung       | N | NA | 0.0392157 | 0.4813453 | 10.119097 | 1 MS2b1   | Infiltrated   | IV  | Bladder Ca | BLCA |
| SAM07a93a28f801  | PR | CR/PR</ |     |      |      |          |      |           |   |                     |                         |   |    |           |           |           |           |               |     |            |      |

|                 |    |       |     |      |      |          |      |           |       |            |            |                         |                         |    |           |           |           |           |                |              |            |      |
|-----------------|----|-------|-----|------|------|----------|------|-----------|-------|------------|------------|-------------------------|-------------------------|----|-----------|-----------|-----------|-----------|----------------|--------------|------------|------|
| SAMcc7a42d87e9c | PR | CR/PR | IC2 | IC2+ | TC0  | inflamed | 26 F | WHITE     | N     | 1 PREVIOUS | Visceral   | (less than) Ureter      | N                       | NA | 4.9607843 | 0.7375228 | 17.215606 | 0 MS2a1   | Genomicall     | Bladder Ca   | BLCA       |      |
| SAMcc39d79b441  | PD | SD/PD | IC2 | IC2+ | TC0  | inflamed | 14 M | WHITE     | N     | 0 PREVIOUS | Visceral   | (less than) lbladder    | N                       | NA | 0.8431373 | 0.6837076 | 6.275154  | 1 MS2b2.2 | Basal/SCC-IV   | Bladder Ca   | BLCA       |      |
| SAM75f12d1a55fc | SD | SD/PD | IC2 | IC2+ | TC0  | inflamed | 6 M  | WHITE     | N     | 0 PREVIOUS | Visceral   | 1-2 years lung          | Y                       | N  | 0.3333333 | 0.7480559 | 14.75154  | 0 MS2b1   | Infiltrated IV | Bladder Ca   | BLCA       |      |
| SAM6964a6d7b967 | PD | SD/PD | IC1 | IC0  | TC1  | NA       | 5 M  | WHITE     | N     | 1 PREVIOUS | Visceral   | (less than) lbladder    | N                       | NA | 1.1764706 | 0.8860162 | 16.262834 | 1 MS2a1   | Genomicalll    | Bladder Ca   | BLCA       |      |
| SAM3b1066e5801b | SD | SD/PD | IC2 | IC2+ | TC0  | excluded | 2 M  | WHITE     | N     | 1 NEVER    | LN Only    | (less than) llymph node | Y                       | N  | 0.1764706 | 0.3867218 | 15.638604 | 0 MS2b1   | Infiltrated IV | Bladder Ca   | BLCA       |      |
| SAMf20b827dca51 | PD | SD/PD | IC2 | IC2+ | TC0  | inflamed | 14 M | WHITE     | N     | 0 NEVER    | LN Only    | (less than) lkidney     | Y                       | N  | 1.0980392 | 0.8111415 | 4.3696099 | 1 MS2b1   | Infiltrated II | Bladder Ca   | BLCA       |      |
| SAM6792d6e98068 | PD | SD/PD | IC2 | IC2+ | TC0  | desert   | 17 M | BLACK OBY | N     | 2 PREVIOUS | Liver      | (less than) lbladder    | N                       | NA | 1.1176471 | 1.0716011 | 6.0123203 | 1 MS1b    | UroA I         | Bladder Ca   | BLCA       |      |
| SAM31d9176e11fb | CR | CR/PR | IC2 | IC2+ | TC1  | inflamed | 23 M | WHITE     | Y     | 0 NEVER    | LN Only    | (less than) lbladder    | N                       | NA | 4.2352941 | 0.8115696 | 17.117043 | 0 MS2b2.1 | UroB I         | Bladder Ca   | BLCA       |      |
| SAM04c589eb3fb3 | NE | NA    | IC1 | IC1  | TC0  | NA       | 50 M | WHITE     | N     | 2 NEVER    | Visceral   | (less than) lbladder    | N                       | NA | NA        | 0.2122952 | 0.6899384 | 0 MS2b2.1 | UroB III       | Bladder Ca   | BLCA       |      |
| SAM5cc2d9036053 | PD | SD/PD | IC0 | IC0  | TC0  | desert   | 11 M | WHITE     | N     | 1 NEVER    | LN Only    | (less than) lbladder    | N                       | NA | 0.4117647 | 0.2643724 | 5.6837782 | 1 MS2b1   | Infiltrated I  | Bladder Ca   | BLCA       |      |
| SAMb8101c538753 | SD | SD/PD | IC2 | IC2+ | TC2+ | inflamed | 16 M | WHITE     | N     | 1 PREVIOUS | Liver      | (less than) lbladder    | N                       | NA | 3.7647059 | 0.5623446 | 13.404517 | 1 MS2b2.2 | Basal/SCC-IV   | Bladder Ca   | BLCA       |      |
| SAM80c6183220e6 | PD | SD/PD | IC1 | IC1  | TC0  | inflamed | 8 M  | WHITE     | N     | 0 CURRENT  | LN Only    | (less than) lkidney     | N                       | NA | 0.2156863 | 0.5419343 | 14.75154  | 0 MS2b2.2 | Basal/SCC-III  | Bladder Ca   | BLCA       |      |
| SAM572f19794c96 | CR | CR/PR | IC1 | IC1  | TC2+ | excluded | 33 M | WHITE     | N     | 1 PREVIOUS | Visceral   | 1-2 years kidney        | N                       | NA | 5.5098039 | 0.678423  | 16.821355 | 0 MS2b2.2 | Basal/SCC-III  | Bladder Ca   | BLCA       |      |
| SAM1abf01dd4544 | PR | CR/PR | IC1 | IC1  | TC0  | excluded | 16 M | WHITE     | N     | 2 PREVIOUS | Visceral   | (less than) lkidney     | N                       | NA | 1.8627451 | 0.5074084 | 16.854209 | 0 MS2a2   | Genomicalll    | Bladder Ca   | BLCA       |      |
| SAM183ebd6be9b  | PD | SD/PD | IC1 | IC1  | TC0  | desert   | 6 M  | WHITE     | N     | 1 NEVER    | Liver      | (less than) lkidney     | N                       | NA | 0.5490196 | 0.4723109 | 3.5154004 | 1 MS1b    | UroA I         | Bladder Ca   | BLCA       |      |
| SAM1f66db567eb5 | PR | CR/PR | IC2 | IC2+ | TC0  | inflamed | 38 M | WHITE     | N     | 2 CURRENT  | Liver      | 1-2 years bladder       | Y                       | N  | 4.5098039 | 0.7319505 | 16.591376 | 0 MS2b2.2 | Basal/SCC-III  | Bladder Ca   | BLCA       |      |
| SAM4918c524b83a | NE | NA    | IC1 | IC1  | TC0  | desert   | 14 M | WHITE     | Y     | 2 CURRENT  | Visceral   | (less than) lbladder    | N                       | NA | NA        | 0.7098706 | 0.62423   | 0 MS1b    | UroA I         | Bladder Ca   | BLCA       |      |
| SAMa0ca029b7afd | NE | NA    | IC0 | IC0  | TC0  | NA       | 12 M | WHITE     | N     | 1 PREVIOUS | Visceral   | (less than) lNA         | N                       | NA | 0.745098  | 0.6420242 | 0.3613963 | 1 MS1b    | UroA II        | Bladder Ca   | BLCA       |      |
| SAM6157c8f38b72 | PR | CR/PR | IC1 | IC1  | TC0  | desert   | 9 M  | WHITE     | N     | 0 PREVIOUS | Visceral   | (less than) lbladder    | N                       | NA | 1.8039216 | 0.6707582 | 16.591376 | 0 MS2b1   | Infiltrated I  | Bladder Ca   | BLCA       |      |
| SAMe7e4f7c076a7 | PD | SD/PD | IC2 | IC2+ | TC2+ | inflamed | 1 M  | WHITE     | N     | 1 PREVIOUS | Visceral   | (less than) lbladder    | N                       | NA | 0.1960784 | 0.8188558 | 1.9712526 | 1 MS2b2.2 | Basal/SCC-IV   | Bladder Ca   | BLCA       |      |
| SAMbe25c2c88f3e | NE | NA    | IC2 | IC2+ | TC1  | NA       | NA   | M         | WHITE | N          | 2 PREVIOUS | LN Only                 | (less than) llymph node | N  | NA        | NA        | 0.6968065 | 2.9240246 | 1 MS2b2.2      | Basal/SCC-IV | Bladder Ca | BLCA |
| SAM4caab264e7fd | PR | CR/PR | IC1 | IC1  | TC0  | excluded | 59 M | WHITE     | N     | 1 PREVIOUS | NA         | 1-2 years ureter        | N                       | NA | 11.686275 | 0.7901463 | 15.704312 | 0 MS1a    | UroA III       | Bladder Ca   | BLCA       |      |
| SAMc6eff056c89a | PD | SD/PD | IC0 | IC0  | TC0  | excluded | 3 M  | WHITE     | N     | 1 PREVIOUS | LN Only    | (less than) llymph node | N                       | NA | 0.4509804 | 0.8758131 | 1.8069815 | 1 MS2b2.1 | UroB III       | Bladder Ca   | BLCA       |      |
| SAM5cfa1699bdb7 | PD | SD/PD | IC0 | IC0  | TC0  | NA       | 10 M | WHITE     | Y     | 0 PREVIOUS | Visceral   | (less than) lliver      | Y                       | N  | 1.2156863 | 0.7884063 | 15.835729 | 0 MS2b1   | Infiltrated II | Bladder Ca   | BLCA       |      |
| SAMda4d892d4d8  | PD | SD/PD | IC1 | IC1  | TC0  | NA       | 4 M  | WHITE     | N     | 0 PREVIOUS | Visceral   | (less than) lkidney     | N                       | NA | 0.2745098 | 0.4214913 | 14.12731  | 0 MS2b1   | Infiltrated IV | Bladder Ca   | BLCA       |      |
| SAM3a1c9632ff7b | SD | SD/PD | IC0 | IC0  | TC0  | NA       | NA   | M         | WHITE | N          | 0 NEVER    | Visceral                | (less than) llung       | N  | NA        | NA        | 0.6278213 | 16.032854 | 0 MS1b         | UroA II      | Bladder Ca | BLCA |
| SAM8b4b8b0f9e73 | SD | SD/PD | IC1 | IC1  | TC0  | excluded | 7 M  | WHITE     | N     | 0 PREVIOUS | LN Only    | (less than) lkidney     | N                       | NA | 1         | 0.5817361 | 15.671458 | 0 MS2b1   | Infiltrated I  | Bladder Ca   | BLCA       |      |
| SAMe3d4266775a9 | PD | SD/PD | IC0 | IC0  | TC0  | NA       | NA   | M         | WHITE | Y          | 0 PREVIOUS | Visceral                | 1-2 years bladder       | Y  | Y         | NA        | 0.9337484 | 13.995893 | 0 MS1b         | UroA I       | Bladder Ca | BLCA |
| SAM2dc7effb5f72 | NE | NA    | IC1 | IC1  | TC2+ | NA       | NA   | M         | WHITE | Y          | 1 PREVIOUS | LN Only                 | 1-2 years bladder       | Y  | Y         | NA        | 0.4459105 | 1.8398357 | 1 MS2a1        | Genomicalll  | Bladder Ca | BLCA |

Supplementary Figure 1

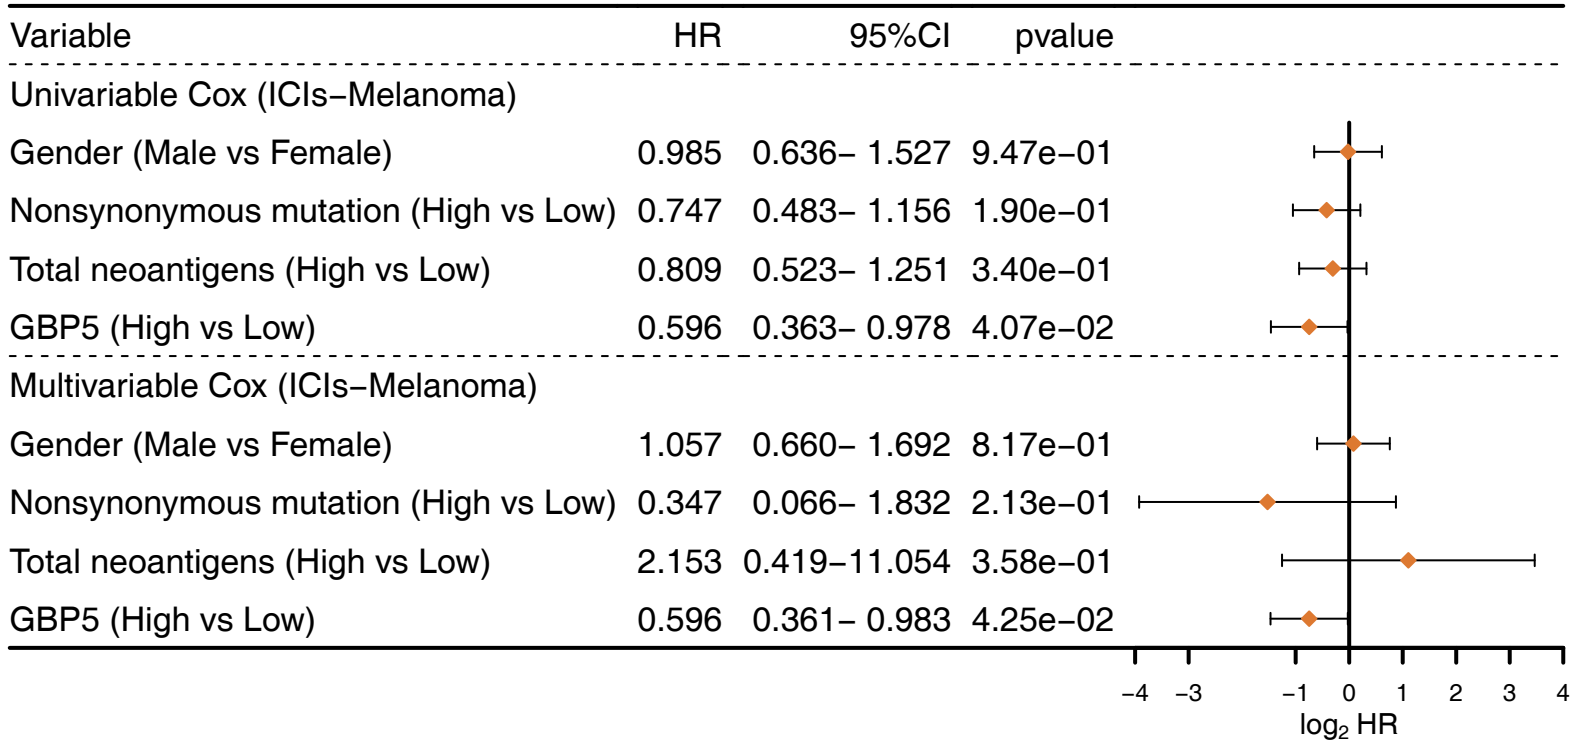

Supplement: Supplementary file 1 [file get_supplementary_file.php]
